# Supplementary material for: Fine-Tuning Summer Research Programs to Promote Underrepresented Students’ Persistence in the STEM Pathway
Source: Atypon-hosted journal article supplement (doi:10.1187/cbe.16-01-0046), 2016-08-06
Supplement: combinedsupmats.pdf [file combinedsupmats.pdf]

# Supplemental Material

*CBE—Life Sciences Education*

Ghee *et al.*

**2013 SR-EIP and LAMI Pre-Survey**

**Undergraduates have many different experiences before participating in Leadership Alliance programs. The next few items are included to find out more about these experiences.**

**Pr3\_A1** Have you ever participated in an undergraduate research program prior to the 2013 SR-EIP/LAMI?

- Yes (1)
- No (2)

If No Is Selected, Then Skip To **Pr3\_A2...** *What other activities or experiences...*

How many times prior to summer 2013 have you participated in the following programs?

|                 |                                                                           | 3+<br>(Times)<br>(1)  | 2<br>(2)              | 1<br>(Time)<br>(3)    | NA<br>(4)             |
|-----------------|---------------------------------------------------------------------------|-----------------------|-----------------------|-----------------------|-----------------------|
| <b>Pr3_A1a1</b> | Leadership Alliance Summer Research Early Identification Program (SR-EIP) | <input type="radio"/> | <input type="radio"/> | <input type="radio"/> | <input type="radio"/> |
| <b>Pr3_A1a2</b> | Leadership Alliance Mellon Initiative (LAMI)                              | <input type="radio"/> | <input type="radio"/> | <input type="radio"/> | <input type="radio"/> |
| <b>Pr3_A1a3</b> | CIC Summer Research Opportunities Program                                 | <input type="radio"/> | <input type="radio"/> | <input type="radio"/> | <input type="radio"/> |
| <b>Pr3_A1a4</b> | Amgen Scholars Program                                                    | <input type="radio"/> | <input type="radio"/> | <input type="radio"/> | <input type="radio"/> |
| <b>Pr3_A1a5</b> | Mellon Mays Undergraduate Fellowship (MMUF) Program                       | <input type="radio"/> | <input type="radio"/> | <input type="radio"/> | <input type="radio"/> |
| <b>Pr3_A1a6</b> | Minority Access to Research Careers (MARC) Program                        | <input type="radio"/> | <input type="radio"/> | <input type="radio"/> | <input type="radio"/> |

**Pr3\_A1b** Please specify any other undergraduate research or academic enrichment programs in which you currently participate or have participated in:

- At your home institution (please specify): (1) \_\_\_\_\_
- External to your home institution (please specify): (2) \_\_\_\_\_
- None (3)
- Pr3\_A1bTEXT** -- given above choice, text for 'please specify' is recorded here

What other activities or experiences have you participated in to introduce you to research? (Select all that apply)

- Pr3\_A2a** Introductory coursework on theories/concepts specific to your discipline
- Pr3\_A2b** Research methods coursework
- Pr3\_A2c** Seminars, lectures, or symposia on research in your discipline
- Pr3\_A2d** Independent study on research in your discipline
- Pr3\_A2e** Lab work assisting with research
- Pr3\_A2f** Research support activities for faculty (e.g., literature reviews, summaries, online searches, etc.)
- Pr3\_A2g** Assistantship or internship (e.g., research, teaching, tutoring, etc.)
- Pr3\_A2h** On-campus research conferences
- Pr3\_A2i** Discipline-specific club or organization
- Pr3\_A2j** Off-campus research conferences
- Pr3\_A2k** Visits to graduate schools offering programs in your discipline
- Pr3\_A2l** Other (please specify): \_\_\_\_ **Pr3\_A2ITEXT** \_\_\_\_\_

**Pr3\_A3** During your 2013 summer research experience, how do you plan to integrate or utilize any of the experience or skills you have gained through your undergraduate coursework?

**As you get ready for your summer program, we have a few questions about your understanding of mentoring and support activities.**

**Pr3\_A5** Have you communicated with your faculty research mentor prior to the start of the 2013 SR-EIP/LAMI program?

- Yes (1)
- No (2)

If No Is Selected, Then Skip To **Pr3\_B2...** *In thinking about the research experience...*

**Pr3\_A6** Which of the following describes your communication with your mentor?

- Received written materials about the research program in which you will participate (1)
- Received a reading assignment (2)
- Exchanged emails about research activities for the summer (3)
- Exchanged emails about schedules and logistics for the summer program (4)
- Other (please specify): (5) \_\_\_\_ **[ Pr3\_A6TEXT ]** \_\_\_\_\_

In thinking about the research experience you will be engaged in this summer, please consider the following ways your mentor may interact with you and indicate the importance of each to you.

|                |                                                                                                                    | Very important<br>(1) | Somewhat important<br>(2) | Not very important<br>(3) | Not at all important<br>(4) |
|----------------|--------------------------------------------------------------------------------------------------------------------|-----------------------|---------------------------|---------------------------|-----------------------------|
| <b>Pr3_B2a</b> | Availability to discuss and respond to questions about your research.                                              | <input type="radio"/> | <input type="radio"/>     | <input type="radio"/>     | <input type="radio"/>       |
| <b>Pr3_B2b</b> | Offering guidance and advice on your research.                                                                     | <input type="radio"/> | <input type="radio"/>     | <input type="radio"/>     | <input type="radio"/>       |
| <b>Pr3_B2c</b> | Showing interest in your research and be supportive of your ideas.                                                 | <input type="radio"/> | <input type="radio"/>     | <input type="radio"/>     | <input type="radio"/>       |
| <b>Pr3_B2d</b> | Helping you establish relationships by introducing you to other faculty, graduate students and researchers.        | <input type="radio"/> | <input type="radio"/>     | <input type="radio"/>     | <input type="radio"/>       |
| <b>Pr3_B2e</b> | Helping you make the distinction between undergraduate research and large scale projects in a research university. | <input type="radio"/> | <input type="radio"/>     | <input type="radio"/>     | <input type="radio"/>       |
| <b>Pr3_B2f</b> | Making you feel like an integral part of the research project.                                                     | <input type="radio"/> | <input type="radio"/>     | <input type="radio"/>     | <input type="radio"/>       |
| <b>Pr3_B2g</b> | Introducing you to a range of methodological techniques in research.                                               | <input type="radio"/> | <input type="radio"/>     | <input type="radio"/>     | <input type="radio"/>       |
| <b>Pr3_B2h</b> | Providing you with constructive feedback on your academic career development.                                      | <input type="radio"/> | <input type="radio"/>     | <input type="radio"/>     | <input type="radio"/>       |

**In this final section, we want to know a bit more about your preparation and plans for building upon your summer research experience.**

Please indicate your level of knowledge about each of the following topics:

|                |                                                                                               | None<br>(1)           | Beginning<br>(2)      | Intermediate<br>(3)   | High<br>(4)           |
|----------------|-----------------------------------------------------------------------------------------------|-----------------------|-----------------------|-----------------------|-----------------------|
| <b>Pr3_C1a</b> | The overall research process                                                                  | <input type="radio"/> | <input type="radio"/> | <input type="radio"/> | <input type="radio"/> |
| <b>Pr3_C1b</b> | Professional aspects of research                                                              | <input type="radio"/> | <input type="radio"/> | <input type="radio"/> | <input type="radio"/> |
| <b>Pr3_C1c</b> | Ethical aspects of research                                                                   | <input type="radio"/> | <input type="radio"/> | <input type="radio"/> | <input type="radio"/> |
| <b>Pr3_C1d</b> | Literature and basic concepts in your research area                                           | <input type="radio"/> | <input type="radio"/> | <input type="radio"/> | <input type="radio"/> |
| <b>Pr3_C1e</b> | Quantitative techniques and methods for data gathering                                        | <input type="radio"/> | <input type="radio"/> | <input type="radio"/> | <input type="radio"/> |
| <b>Pr3_C1f</b> | Approaches to quantitative data analysis                                                      | <input type="radio"/> | <input type="radio"/> | <input type="radio"/> | <input type="radio"/> |
| <b>Pr3_C1g</b> | Qualitative techniques and methods for data gathering                                         | <input type="radio"/> | <input type="radio"/> | <input type="radio"/> | <input type="radio"/> |
| <b>Pr3_C1h</b> | Approaches to qualitative data analysis                                                       | <input type="radio"/> | <input type="radio"/> | <input type="radio"/> | <input type="radio"/> |
| <b>Pr3_C1i</b> | Computer applications for data management and analysis (e.g., SPSS, STATA, SAS, NVIVO, etc.)  | <input type="radio"/> | <input type="radio"/> | <input type="radio"/> | <input type="radio"/> |
| <b>Pr3_C1j</b> | Bibliographic/reference software that manages research citations (e.g., EndNote and RefWorks) | <input type="radio"/> | <input type="radio"/> | <input type="radio"/> | <input type="radio"/> |
| <b>Pr3_C1k</b> | Critical reading skills and tools for the analysis of text                                    | <input type="radio"/> | <input type="radio"/> | <input type="radio"/> | <input type="radio"/> |
| <b>Pr3_C1l</b> | Data mining techniques (e.g., text mining and stemmatic analysis)                             | <input type="radio"/> | <input type="radio"/> | <input type="radio"/> | <input type="radio"/> |
| <b>Pr3C1m</b>  | Techniques and tools for conducting archival research                                         | <input type="radio"/> | <input type="radio"/> | <input type="radio"/> | <input type="radio"/> |
| <b>Pr3_C1n</b> | Techniques for conducting individual and group interviews                                     | <input type="radio"/> | <input type="radio"/> | <input type="radio"/> | <input type="radio"/> |
| <b>Pr3_C1o</b> | Research report preparation                                                                   | <input type="radio"/> | <input type="radio"/> | <input type="radio"/> | <input type="radio"/> |
| <b>Pr3_C1p</b> | Research report presentation                                                                  | <input type="radio"/> | <input type="radio"/> | <input type="radio"/> | <input type="radio"/> |

Based on your knowledge and experiences to date, indicate your response to each of the following statements about graduate school.

|                |                                                                                                                                                   | Strongly agree (1)    | Agree (2)             | Disagree (3)          | Strongly Disagree (4) |
|----------------|---------------------------------------------------------------------------------------------------------------------------------------------------|-----------------------|-----------------------|-----------------------|-----------------------|
| <b>Pr3_E1a</b> | I have a solid understanding of the graduate school application process                                                                           | <input type="radio"/> | <input type="radio"/> | <input type="radio"/> | <input type="radio"/> |
| <b>Pr3_E1b</b> | I have a solid understanding of graduate school life                                                                                              | <input type="radio"/> | <input type="radio"/> | <input type="radio"/> | <input type="radio"/> |
| <b>Pr3_E1c</b> | My discussions with faculty, postdocs and graduate students this summer will help me make informed decisions about graduate school and my future. | <input type="radio"/> | <input type="radio"/> | <input type="radio"/> | <input type="radio"/> |
| <b>Pr3_E1d</b> | I have a solid understanding of the careers available to me in my discipline.                                                                     | <input type="radio"/> | <input type="radio"/> | <input type="radio"/> | <input type="radio"/> |
| <b>Pr3_E1e</b> | I plan to pursue an academic career.                                                                                                              | <input type="radio"/> | <input type="radio"/> | <input type="radio"/> | <input type="radio"/> |
| <b>Pr3_E1f</b> | I plan to pursue a research career outside academia                                                                                               | <input type="radio"/> | <input type="radio"/> | <input type="radio"/> | <input type="radio"/> |
| <b>Pr3_E2a</b> | I plan to attend graduate school to pursue a PhD.                                                                                                 | <input type="radio"/> | <input type="radio"/> | <input type="radio"/> | <input type="radio"/> |
| <b>Pr3_E2b</b> | I plan to attend graduate school to pursue a MD-PhD degree.                                                                                       | <input type="radio"/> | <input type="radio"/> | <input type="radio"/> | <input type="radio"/> |
| <b>Pr3_E2c</b> | I plan to attend graduate school to pursue a Master's degree.                                                                                     | <input type="radio"/> | <input type="radio"/> | <input type="radio"/> | <input type="radio"/> |

**Pr3\_F1** How do you believe your research experiences to date will be enhanced during the SR-EIP/LAMI summer research program?

**Pr3\_F2** Overall, what do you hope to gain from your Leadership Alliance summer research experience?

## 2013 SR-EIP/LAMI Post-Survey

### Program Preparation, Schedule and Context

**NOTE: The 2013 survey asked only about participants' perceptions of a specific reading assignment sent to them prior to starting their program. They were NOT asked about informational materials, published articles or research papers about their mentor's work, or 'other' items received prior to the program (A6a1, A6a3, A6a4). As well, they were not asked about communications to prepare them for program (A1a-A1d).**

**Pro3\_A6a2** Did you receive a reading assignment prior to the start of the 2013 SR-EIP/LAMI?

- Yes (1)
- No (2)

If No Is Selected, Then Skip To **Po3\_A7** -- *Did you receive a reading assignment during...*

Regarding the **reading assignment(s)** you received prior to the start of your SR-EIP/LAMI...

|                  |                                                                 | Yes<br>(1)            | No<br>(2)             |
|------------------|-----------------------------------------------------------------|-----------------------|-----------------------|
| <b>Pro3_A6b1</b> | Did you complete the assignment?                                | <input type="radio"/> | <input type="radio"/> |
| <b>Pro3_A6b2</b> | Were you required to submit a written report on the assignment? | <input type="radio"/> | <input type="radio"/> |
| <b>Pro3_A6b3</b> | Did you engage in one-on-one discussion of the readings?        | <input type="radio"/> | <input type="radio"/> |
| <b>Pro3_A6b4</b> | Did you engage in small group discussion of the readings?       | <input type="radio"/> | <input type="radio"/> |

**Pro3\_A6c2** How useful did you find the **pre-reading assignment**?

- Very useful (1)
- Moderately useful (2)
- Not very useful (3)
- Not at all useful (4)

**Po3\_A7** Did you receive a reading assignment(s) during the 2013 SR-EIP/LAMI?

- Yes (1)
- No (2)

If No Is Selected, Then Skip To **Po3\_A8a...** During your SR-EIP experience...

Regarding the reading assignment(s) you received during your SR-EIP/LAMI...

|                 |                                                                 | Yes (1)               | No (2)                |
|-----------------|-----------------------------------------------------------------|-----------------------|-----------------------|
| <b>Po3_A7a1</b> | Did you complete the assignment?                                | <input type="radio"/> | <input type="radio"/> |
| <b>Po3_A7a2</b> | Were you required to submit a written report on the assignment? | <input type="radio"/> | <input type="radio"/> |
| <b>Po3_A7a3</b> | Did you engage in one-on-one discussion of the readings?        | <input type="radio"/> | <input type="radio"/> |
| <b>Po3_A7a4</b> | Did you engage in small group discussion of the readings?       | <input type="radio"/> | <input type="radio"/> |

**Po3\_A7b** How useful did you find the reading assignment(s) provided during your program?

- Very useful (1)
- Moderately useful (2)
- Not very useful (3)
- Not at all useful (4)

During your SR-EIP/LAMI experience, how many hours each week did you typically spend on the following:

|                |                                                                                                                                                | 20 or more hours (1)  | 10-19 hours (2)       | 5-9 hours (3)         | Less than 5 hours (4) | NA (5)                |
|----------------|------------------------------------------------------------------------------------------------------------------------------------------------|-----------------------|-----------------------|-----------------------|-----------------------|-----------------------|
| <b>Po3_A8a</b> | Lectures                                                                                                                                       | <input type="radio"/> |
| <b>Po3_A8b</b> | Formal seminars and symposia                                                                                                                   | <input type="radio"/> |
| <b>Po3_A8c</b> | Small group discussions                                                                                                                        | <input type="radio"/> |
| <b>Po3_A8d</b> | Study groups                                                                                                                                   | <input type="radio"/> |
| <b>Po3_A8e</b> | One-on-one tutorials                                                                                                                           | <input type="radio"/> |
| <b>Po3_A8f</b> | Laboratory work                                                                                                                                | <input type="radio"/> |
| <b>Po3_A8g</b> | Library/museum work                                                                                                                            | <input type="radio"/> |
| <b>Po3_A8h</b> | Data gathering                                                                                                                                 | <input type="radio"/> |
| <b>Po3_A8i</b> | Data analysis                                                                                                                                  | <input type="radio"/> |
| <b>Po3_A8j</b> | Preparation of research presentation                                                                                                           | <input type="radio"/> |
| <b>Po3_A8k</b> | Professional development activities (e.g., GRE exam preparation, financial aid for graduate school, graduate school application process, etc.) | <input type="radio"/> |
| <b>Po3_A8l</b> | Social events or gatherings                                                                                                                    | <input type="radio"/> |
| <b>Po3_A8m</b> | Other activities directly related to your research project (please specify): [ <b>Po3_A8mTXT</b> ]                                             | <input type="radio"/> |



## Mentoring and Support

**Po3\_B1** For your SR-EIP/LAMI, who served as your primary research mentor?

- Faculty mentor (1)
- Postdoctoral research mentor (2)
- Graduate student mentor (3)
- Other (please specify): (4) \_\_\_\_ [ **Po3\_B1TEXT** ] \_\_\_\_\_

Based on the contact with your primary research mentor, how would you rate him/her on the following qualities?

|                 |                                                                                                                   | Excellent<br>(1)      | Good<br>(2)           | Fair<br>(3)           | Poor<br>(4)           |
|-----------------|-------------------------------------------------------------------------------------------------------------------|-----------------------|-----------------------|-----------------------|-----------------------|
| <b>Pro3_B2a</b> | Being available to discuss and respond to questions about your research                                           | <input type="radio"/> | <input type="radio"/> | <input type="radio"/> | <input type="radio"/> |
| <b>Pro3_B2b</b> | Offering guidance and advice on your research                                                                     | <input type="radio"/> | <input type="radio"/> | <input type="radio"/> | <input type="radio"/> |
| <b>Pro3_B2c</b> | Showing interest in your research and being supportive of your ideas                                              | <input type="radio"/> | <input type="radio"/> | <input type="radio"/> | <input type="radio"/> |
| <b>Pro3_B2d</b> | Helping you establish relationships by introducing you to other faculty, graduate students and researchers        | <input type="radio"/> | <input type="radio"/> | <input type="radio"/> | <input type="radio"/> |
| <b>Pro3_B2e</b> | Helping you make the distinction between undergraduate research and large-scale projects in a research university | <input type="radio"/> | <input type="radio"/> | <input type="radio"/> | <input type="radio"/> |
| <b>Pro3_B2f</b> | Making you feel like an integral part of the research project.                                                    | <input type="radio"/> | <input type="radio"/> | <input type="radio"/> | <input type="radio"/> |
| <b>Pro3_B2g</b> | Introducing you to a range of methodological techniques in research                                               | <input type="radio"/> | <input type="radio"/> | <input type="radio"/> | <input type="radio"/> |
| <b>Pro3_B2h</b> | Providing you with constructive feedback on your academic career development.                                     | <input type="radio"/> | <input type="radio"/> | <input type="radio"/> | <input type="radio"/> |
| <b>Pro3_B2i</b> | Giving you a good sense of how your project fit within the overall goals of the project                           | <input type="radio"/> | <input type="radio"/> | <input type="radio"/> | <input type="radio"/> |
| <b>Pro3_B2j</b> | Demonstrating knowledge/expertise in your field                                                                   | <input type="radio"/> | <input type="radio"/> | <input type="radio"/> | <input type="radio"/> |

*NOTE: Pro3\_B2i and Pro3\_B2j were not included on pre-survey*

**Po3\_B3** Please rate your overall satisfaction with your primary research mentor.

- Very satisfied (1)
- Somewhat satisfied (2)
- Somewhat dissatisfied (3)
- Very dissatisfied (4)

**Po3\_B4a** How likely is it that you will ask your primary research mentor for a letter of recommendation when you apply for a graduate program?

- Very likely (1)
- Somewhat likely (2)
- Somewhat unlikely (3)
- Not at all likely (4)

If *Very likely* Is Selected, Then Skip To **Po3\_B5a** *If your primary research...*

If *Somewhat likely* Is Selected, Then Skip To **Po3\_B5a** *If your primary research...*

**Po3\_B4b** Please explain why you would not ask your primary research mentor for a letter of recommendation.

Answer If **Po3\_B1** *For your SR-EIP/LAMI, who served as your primary ... Faculty mentor* Is Not Selected

**Po3\_B5a** If your primary research mentor was a graduate student or postdoc, how likely is it that you will ask your faculty mentor for a letter of recommendation?

- Very likely (1)
- Somewhat likely (2)
- Somewhat unlikely (3)
- Not at all likely (4)
- NA (5)

If *Very Likely* Is Selected, Then Skip To **Po3\_B6a...** *During the next academic year,...*

If *Somewhat Likely* Is Selected, Then Skip To **Po3\_B6a...** *During the next academic year,...*

Answer If **Po3\_B1** *For your SR-EIP/LAMI, who served as your primary ... Faculty mentor* Is Not Selected

**Po3\_B5b** Please explain why you would not ask your faculty mentor for a letter of recommendation.

During the next academic year, how likely are you to keep in touch with the various individuals you met at your summer research site?

|                |                                               | Very likely (1)       | Somewhat likely (2)   | Somewhat unlikely (3) | Not at all likely (4) | NA (5)                |
|----------------|-----------------------------------------------|-----------------------|-----------------------|-----------------------|-----------------------|-----------------------|
| <b>Po3_B6a</b> | Your faculty mentor                           | <input type="radio"/> |
| <b>Po3_B6b</b> | Postdoctoral fellow(s)                        | <input type="radio"/> |
| <b>Po3_B6c</b> | Graduate student(s)                           | <input type="radio"/> |
| <b>Po3_B6d</b> | SR-EIP summer program coordinator             | <input type="radio"/> |
| <b>Po3_B6e</b> | Other SR-EIP/LAMI students                    | <input type="radio"/> |
| <b>Po3_B6f</b> | Other (please specify): [ <b>Po3_B6fTXT</b> ] | <input type="radio"/> |

**Po3\_B7** How has the guidance you received from your mentor and others at your summer research site influenced your future choices and plans?

## Research Experience and Impact

Now that you have participated in the 2013 SR-EIP/LAMI, please indicate your level of knowledge about each of the following topics:

|                 |                                                                                                      | None<br>(1)           | Beginning<br>(2)      | Intermediate<br>(3)   | High<br>(4)           |
|-----------------|------------------------------------------------------------------------------------------------------|-----------------------|-----------------------|-----------------------|-----------------------|
| <b>Pro3_C1a</b> | The overall research process                                                                         | <input type="radio"/> | <input type="radio"/> | <input type="radio"/> | <input type="radio"/> |
| <b>Pro3_C1b</b> | Professional aspects of research                                                                     | <input type="radio"/> | <input type="radio"/> | <input type="radio"/> | <input type="radio"/> |
| <b>Pro3_C1c</b> | Ethical aspects of research                                                                          | <input type="radio"/> | <input type="radio"/> | <input type="radio"/> | <input type="radio"/> |
| <b>Pro3_C1d</b> | Literature and basic concepts in your research area                                                  | <input type="radio"/> | <input type="radio"/> | <input type="radio"/> | <input type="radio"/> |
| <b>Pro3_C1e</b> | Quantitative techniques and methods for data gathering                                               | <input type="radio"/> | <input type="radio"/> | <input type="radio"/> | <input type="radio"/> |
| <b>Pro3_C1f</b> | Approaches to quantitative data analysis                                                             | <input type="radio"/> | <input type="radio"/> | <input type="radio"/> | <input type="radio"/> |
| <b>Pro3_C1g</b> | Qualitative techniques and methods for data gathering                                                | <input type="radio"/> | <input type="radio"/> | <input type="radio"/> | <input type="radio"/> |
| <b>Pro3_C1h</b> | Approaches to qualitative data analysis                                                              | <input type="radio"/> | <input type="radio"/> | <input type="radio"/> | <input type="radio"/> |
| <b>Pro3_C1i</b> | Computer applications for data management and analysis (e.g., SPSS, STATA, SAS, NVIVO, MATLAB, etc.) | <input type="radio"/> | <input type="radio"/> | <input type="radio"/> | <input type="radio"/> |
| <b>Pro3_C1j</b> | Bibliographic/reference software that manages research citations (e.g., EndNote and RefWorks)        | <input type="radio"/> | <input type="radio"/> | <input type="radio"/> | <input type="radio"/> |
| <b>Pro3_C1k</b> | Critical reading skills and tools for the analysis of text                                           | <input type="radio"/> | <input type="radio"/> | <input type="radio"/> | <input type="radio"/> |
| <b>Pro3_C1l</b> | Data mining techniques (such as text mining and stemmatic analysis)                                  | <input type="radio"/> | <input type="radio"/> | <input type="radio"/> | <input type="radio"/> |
| <b>Pro3_C1m</b> | Techniques and tools for conducting archival research                                                | <input type="radio"/> | <input type="radio"/> | <input type="radio"/> | <input type="radio"/> |
| <b>Pro3_C1n</b> | Techniques for conducting individual and/or group interviews                                         | <input type="radio"/> | <input type="radio"/> | <input type="radio"/> | <input type="radio"/> |
| <b>Pro3_C1o</b> | Research report preparation                                                                          | <input type="radio"/> | <input type="radio"/> | <input type="radio"/> | <input type="radio"/> |
| <b>Pro3_C1p</b> | Research report presentation                                                                         | <input type="radio"/> | <input type="radio"/> | <input type="radio"/> | <input type="radio"/> |

**Answer If TLAstat Is Not Equal to LAMI**

Listed below are statements about methodological techniques and skills employed in conducting research. Based on your research experiences this summer, indicate the extent to which you agree with each of the following statements:

|                |                                                                                                                                                           | Strongly agree<br>(1) | Agree<br>(2)          | Disagree<br>(3)       | Strongly disagree<br>(4) | Not applicable to my discipline<br>(5) |
|----------------|-----------------------------------------------------------------------------------------------------------------------------------------------------------|-----------------------|-----------------------|-----------------------|--------------------------|----------------------------------------|
| <b>Po3_C2a</b> | I attended a library orientation and became familiar with the scholarly resources available.                                                              | <input type="radio"/> | <input type="radio"/> | <input type="radio"/> | <input type="radio"/>    | <input type="radio"/>                  |
| <b>Po3_C2b</b> | I was provided with new techniques to sharpen my critical reading skills and tools for the analysis of text.                                              | <input type="radio"/> | <input type="radio"/> | <input type="radio"/> | <input type="radio"/>    | <input type="radio"/>                  |
| <b>Po3_C2c</b> | I was provided training on methodological techniques.                                                                                                     | <input type="radio"/> | <input type="radio"/> | <input type="radio"/> | <input type="radio"/>    | <input type="radio"/>                  |
| <b>Po3_C2d</b> | I was provided the opportunity to discuss the methodological approaches and overall results of current journal articles with fellow students and faculty. | <input type="radio"/> | <input type="radio"/> | <input type="radio"/> | <input type="radio"/>    | <input type="radio"/>                  |

**Po3\_C3** How has your research experience this summer enhanced the research and methodological skills you possessed before attending SR-EIP/LAMI?

Thinking about your research, workshops, and seminar experiences this summer, how true would you say the following statements are for you?

|                |                                                                                                      | Very true<br>(1)      | Somewhat true<br>(2)  | Not very true<br>(3)  | Not at all true<br>(4) |
|----------------|------------------------------------------------------------------------------------------------------|-----------------------|-----------------------|-----------------------|------------------------|
| <b>Po3_C4a</b> | My experiences this summer are relevant to my research work at my current undergraduate institution. | <input type="radio"/> | <input type="radio"/> | <input type="radio"/> | <input type="radio"/>  |
| <b>Po3_C4b</b> | The skills I learned this summer will help me with future coursework.                                | <input type="radio"/> | <input type="radio"/> | <input type="radio"/> | <input type="radio"/>  |
| <b>Po3_C4c</b> | The skills I learned this summer will enhance my senior thesis/research projects and/or papers.      | <input type="radio"/> | <input type="radio"/> | <input type="radio"/> | <input type="radio"/>  |
| <b>Po3_C4d</b> | My experiences this summer have inspired me to take new courses that I had not considered before.    | <input type="radio"/> | <input type="radio"/> | <input type="radio"/> | <input type="radio"/>  |
| <b>Po3_C4e</b> | My experiences this summer will enhance my overall undergraduate experience.                         | <input type="radio"/> | <input type="radio"/> | <input type="radio"/> | <input type="radio"/>  |

**Answer If TLAstat Is Not Equal to LAMI**

Listed below are statements about the possible impact of the methodological techniques and skills introduced to you during SR-EIP. Based on your experiences, indicate your response to each of the following statements:

|                | <b>Note that items b, e and h were NOT asked in 2013</b>                                                     | Strongly agree (1)    | Agree (2)             | Disagree (3)          | Strongly disagree (4) | Not applicable to my discipline (5) |
|----------------|--------------------------------------------------------------------------------------------------------------|-----------------------|-----------------------|-----------------------|-----------------------|-------------------------------------|
| <b>Po3_C5a</b> | My critical thinking skills were enhanced through my research and dialogue with fellow students and faculty. | <input type="radio"/>               |
| <b>Po3_C5c</b> | I further developed and improved my research writing skills.                                                 | <input type="radio"/>               |
| <b>Po3_C5d</b> | My analytical and critical reading skills were sharpened.                                                    | <input type="radio"/>               |
| <b>Po3_C5f</b> | I learned new techniques that enhanced my methodological skills.                                             | <input type="radio"/>               |
| <b>Po3_C5g</b> | I have developed the necessary vocabulary of my discipline to engage in critical dialogue.                   | <input type="radio"/>               |

Please indicate how useful your SR-EIP/LAMI experience was in the following areas:

|                |                                                                        | Very useful (1)       | Somewhat useful (2)   | Not at all useful (3) | NA (4)                |
|----------------|------------------------------------------------------------------------|-----------------------|-----------------------|-----------------------|-----------------------|
| <b>Po3_C6a</b> | Increasing my readiness to engage in demanding research                | <input type="radio"/> | <input type="radio"/> | <input type="radio"/> | <input type="radio"/> |
| <b>Po3_C6b</b> | Improving my self-confidence as a researcher                           | <input type="radio"/> | <input type="radio"/> | <input type="radio"/> | <input type="radio"/> |
| <b>Po3_C6c</b> | Becoming part of a learning community                                  | <input type="radio"/> | <input type="radio"/> | <input type="radio"/> | <input type="radio"/> |
| <b>Po3_C6d</b> | Understanding more clearly what it takes to become a researcher        | <input type="radio"/> | <input type="radio"/> | <input type="radio"/> | <input type="radio"/> |
| <b>Po3_C6e</b> | Gaining confidence in communicating my research to a national audience | <input type="radio"/> | <input type="radio"/> | <input type="radio"/> | <input type="radio"/> |

**Po3\_F1** Please describe below your most positive experience during SR-EIP/LAMI.

**Po3\_F2** Please describe below your most negative experience during SR--EIP/LAMI.

## Professional Development

During your SR-EIP/LAMI, how often did you discuss the following topics with others either at your research site or at other campuses?

|                |                                                       | Often<br>(1)          | Occasionally<br>(2)   | Never<br>(3)          |
|----------------|-------------------------------------------------------|-----------------------|-----------------------|-----------------------|
| <b>Po3_D1a</b> | Research interests                                    | <input type="radio"/> | <input type="radio"/> | <input type="radio"/> |
| <b>Po3_D1b</b> | Information about research project                    | <input type="radio"/> | <input type="radio"/> | <input type="radio"/> |
| <b>Po3_D1c</b> | Information about host department or research mentors | <input type="radio"/> | <input type="radio"/> | <input type="radio"/> |
| <b>Po3_D1d</b> | Applying to graduate school                           | <input type="radio"/> | <input type="radio"/> | <input type="radio"/> |
| <b>Po3_D1e</b> | Information about graduate student life               | <input type="radio"/> | <input type="radio"/> | <input type="radio"/> |
| <b>Po3_D1f</b> | Choosing a career                                     | <input type="radio"/> | <input type="radio"/> | <input type="radio"/> |
| <b>Po3_D1g</b> | Combining a career with personal life                 | <input type="radio"/> | <input type="radio"/> | <input type="radio"/> |
| <b>Po3_D1h</b> | What it takes to be a researcher in my discipline     | <input type="radio"/> | <input type="radio"/> | <input type="radio"/> |
| <b>Po3_D1i</b> | What it means to be an academic                       | <input type="radio"/> | <input type="radio"/> | <input type="radio"/> |
| <b>Po3_D1j</b> | Plans to meet at symposium                            | <input type="radio"/> | <input type="radio"/> | <input type="radio"/> |
| <b>Po3_D1k</b> | Other (Please specify): [ <b>Po3_D1kTXT</b> ]         | <input type="radio"/> | <input type="radio"/> | <input type="radio"/> |

A number of training or informational opportunities are provided during Alliance summer research programs. From the following list, please indicate those provided to you.

|                 |                                                                                                                            | Selected (1)          |
|-----------------|----------------------------------------------------------------------------------------------------------------------------|-----------------------|
| <b>Po3_D2a1</b> | Instruction on presentation style and effective communication                                                              | <input type="radio"/> |
| <b>Po3_D2a2</b> | Skill building in making an oral research presentation                                                                     | <input type="radio"/> |
| <b>Po3_D2a3</b> | Skill building in making a poster presentation of my research                                                              | <input type="radio"/> |
| <b>Po3_D2a4</b> | Information on effective strategies for getting my research published                                                      | <input type="radio"/> |
| <b>Po3_D2a5</b> | Professional guidance on resume development, career options, interviewing skills and related career development strategies | <input type="radio"/> |
| <b>Po3_D2a6</b> | Discussion and advice about maintaining balance between my academic and personal life                                      | <input type="radio"/> |
| <b>Po3_D2a7</b> | Clarification regarding the progression through graduate school and towards the PhD or MD-PhD                              | <input type="radio"/> |
| <b>Po3_D2a8</b> | Information about the availability of fellowships, assistantships, and other support for graduate school                   | <input type="radio"/> |

Please indicate the usefulness of the training and information provided to you?

|                 |                                                                                                                            | Very useful<br>(1)    | Useful<br>(2)         | Not too useful<br>(3) | Not at all useful<br>(4) |
|-----------------|----------------------------------------------------------------------------------------------------------------------------|-----------------------|-----------------------|-----------------------|--------------------------|
| <b>Po3_D2b1</b> | Instruction on presentation style and effective communication                                                              | <input type="radio"/> | <input type="radio"/> | <input type="radio"/> | <input type="radio"/>    |
| <b>Po3_D2b2</b> | Skill building in making an oral research presentation                                                                     | <input type="radio"/> | <input type="radio"/> | <input type="radio"/> | <input type="radio"/>    |
| <b>Po3_D2b3</b> | Skill building in making a poster presentation of my research                                                              | <input type="radio"/> | <input type="radio"/> | <input type="radio"/> | <input type="radio"/>    |
| <b>Po3_D2b4</b> | Information on effective strategies for getting my research published                                                      | <input type="radio"/> | <input type="radio"/> | <input type="radio"/> | <input type="radio"/>    |
| <b>Po3_D2b5</b> | Professional guidance on resume development, career options, interviewing skills and related career development strategies | <input type="radio"/> | <input type="radio"/> | <input type="radio"/> | <input type="radio"/>    |
| <b>Po3_D2b6</b> | Discussion and advice about maintaining balance between my academic and personal life                                      | <input type="radio"/> | <input type="radio"/> | <input type="radio"/> | <input type="radio"/>    |
| <b>Po3_D2b7</b> | Clarification regarding the progression through graduate school and towards the PhD or MD-PhD                              | <input type="radio"/> | <input type="radio"/> | <input type="radio"/> | <input type="radio"/>    |
| <b>Po3_D2b8</b> | Information about the availability of fellowships, assistantships, and other support for graduate school                   | <input type="radio"/> | <input type="radio"/> | <input type="radio"/> | <input type="radio"/>    |



### Graduate School and Future Plans

Based on your experiences and knowledge gained through SR-EIP, indicate your level of agreement with each of the following statements **about graduate school**:

|                 |                                                                                                                                           | Strongly agree<br>(1) | Agree<br>(2)          | Disagree<br>(3)       | Strongly disagree<br>(4) |
|-----------------|-------------------------------------------------------------------------------------------------------------------------------------------|-----------------------|-----------------------|-----------------------|--------------------------|
| <b>Pro3_E1a</b> | I have a solid understanding of the graduate school application process.                                                                  | <input type="radio"/> | <input type="radio"/> | <input type="radio"/> | <input type="radio"/>    |
| <b>Pro3_E1b</b> | I have a solid understanding of graduate student life.                                                                                    | <input type="radio"/> | <input type="radio"/> | <input type="radio"/> | <input type="radio"/>    |
| <b>Pro3_E1c</b> | My discussions with faculty, post-docs, and graduate students will help me make an informed decision about graduate school and my future. | <input type="radio"/> | <input type="radio"/> | <input type="radio"/> | <input type="radio"/>    |
| <b>Pro3_E1g</b> | Overall, I am more confident about planning for my graduate school education.                                                             | <input type="radio"/> | <input type="radio"/> | <input type="radio"/> | <input type="radio"/>    |

Based on your experiences and knowledge gained through SR-EIP, indicate your level of agreement with each of the following statements **about career path/plans**.

|                 |                                                                                                | Strongly agree<br>(1) | Agree<br>(2)          | Disagree<br>(3)       | Strongly disagree<br>(4) |
|-----------------|------------------------------------------------------------------------------------------------|-----------------------|-----------------------|-----------------------|--------------------------|
| <b>Pro3_E1d</b> | I have a solid understanding of the careers available to me in this field.                     | <input type="radio"/> | <input type="radio"/> | <input type="radio"/> | <input type="radio"/>    |
| <b>Pro3_E1e</b> | I plan to pursue an academic career.                                                           | <input type="radio"/> | <input type="radio"/> | <input type="radio"/> | <input type="radio"/>    |
| <b>Pro3_E1f</b> | I plan to pursue a research career outside of academia.                                        | <input type="radio"/> | <input type="radio"/> | <input type="radio"/> | <input type="radio"/>    |
| <b>Pro3_E1h</b> | Overall, I am more confident about planning for a career in research.                          | <input type="radio"/> | <input type="radio"/> | <input type="radio"/> | <input type="radio"/>    |
| <b>Pro3_E3a</b> | I have clarified my career path.                                                               | <input type="radio"/> | <input type="radio"/> | <input type="radio"/> | <input type="radio"/>    |
| <b>Pro3_E3b</b> | I had a plan to pursue a research career before I began SR--EIP, and the plan has not changed. | <input type="radio"/> | <input type="radio"/> | <input type="radio"/> | <input type="radio"/>    |
| <b>Pro3_E3c</b> | My commitment to pursue a research career is stronger.                                         | <input type="radio"/> | <input type="radio"/> | <input type="radio"/> | <input type="radio"/>    |
| <b>Pro3_E3d</b> | I will probably change my major to better position me to pursue a research career.             | <input type="radio"/> | <input type="radio"/> | <input type="radio"/> | <input type="radio"/>    |

*NOTE: Pro3\_E1g and Pro3\_E1h are not on the pre-survey.*

**Pro3\_E2** Which of the following best describes your plans for graduate school within 2-3 years after completing your undergraduate degree:

- I plan to attend graduate school to pursue a Master’s degree. (1)
- I plan to attend graduate school to pursue a PhD. (2)
- I plan to attend graduate school to pursue a MD-PhD. (3)
- I plan to attend graduate school to pursue another professional/doctoral degree program. (4)
- I do not plan to attend graduate school (5)

NOTE: Pro3\_E2 is asked separately for the following choices on the pre-survey: PhD (Pr3\_E2a), MD-PhD (Pr3\_E2b) and masters (Pr3\_E2c)

What is your status regarding the following exams?

|                |                                               | Already taken (1)     | Plan to take (2)      | Do not plan to take (3) | Not sure (4)          |
|----------------|-----------------------------------------------|-----------------------|-----------------------|-------------------------|-----------------------|
| <b>Po3_E4a</b> | MCAT (Medical College Admission Test)         | <input type="radio"/> | <input type="radio"/> | <input type="radio"/>   | <input type="radio"/> |
| <b>Po3_E4b</b> | GRE (Graduate Record Exam)                    | <input type="radio"/> | <input type="radio"/> | <input type="radio"/>   | <input type="radio"/> |
| <b>Po3_E4c</b> | LSAT (Law School Admission Test)              | <input type="radio"/> | <input type="radio"/> | <input type="radio"/>   | <input type="radio"/> |
| <b>Po3_E4d</b> | GMAT (Graduate Management Admission Test)     | <input type="radio"/> | <input type="radio"/> | <input type="radio"/>   | <input type="radio"/> |
| <b>Po3_E4e</b> | Other (please specify): [ <b>Po3_E4eTXT</b> ] | <input type="radio"/> | <input type="radio"/> | <input type="radio"/>   | <input type="radio"/> |

**Po3\_E5** Overall, how much of an impact would you say that SR-EIP/LAMI has had on how you view your future plans?

- A great deal (1)
- Some (2)
- A little (3)
- None (4)

**2014 SR-EIP and LAMI Pre-Survey**

**Undergraduates have many different experiences before participating in Leadership Alliance programs. The next few items are included to find out more about these experiences.**

**Pr4\_A1** Have you ever participated in an undergraduate research program prior to the 2014 SR-EIP/LAMI?

- Yes (1)
- No (2)

If No Is Selected, Then Skip To **Pr4\_A2...** *What other activities or experiences...*

How many times prior to summer 2014 have you participated in the following programs?

|                 |                                                                           | 3+ (Times)<br>(1)     | 2 (2)                 | 1 (Time)<br>(3)       | NA (4)                |
|-----------------|---------------------------------------------------------------------------|-----------------------|-----------------------|-----------------------|-----------------------|
| <b>Pr4_A1a1</b> | Leadership Alliance Summer Research Early Identification Program (SR-EIP) | <input type="radio"/> | <input type="radio"/> | <input type="radio"/> | <input type="radio"/> |
| <b>Pr4_A1a2</b> | Leadership Alliance Mellon Initiative (LAMI)                              | <input type="radio"/> | <input type="radio"/> | <input type="radio"/> | <input type="radio"/> |
| <b>Pr4_A1a3</b> | CIC Summer Research Opportunities Program                                 | <input type="radio"/> | <input type="radio"/> | <input type="radio"/> | <input type="radio"/> |
| <b>Pr4_A1a4</b> | Amgen Scholars Program                                                    | <input type="radio"/> | <input type="radio"/> | <input type="radio"/> | <input type="radio"/> |
| <b>Pr4_A1a5</b> | Mellon Mays Undergraduate Fellowship (MMUF) Program                       | <input type="radio"/> | <input type="radio"/> | <input type="radio"/> | <input type="radio"/> |
| <b>Pr4_A1a6</b> | Minority Access to Research Careers (MARC) Program                        | <input type="radio"/> | <input type="radio"/> | <input type="radio"/> | <input type="radio"/> |

**Pr4\_A1b** Please specify any other undergraduate research or academic enrichment programs in which you currently participate or have participated in:

- At your home institution (please specify): (1) \_\_\_\_\_
- External to your home institution (please specify): (2) \_\_\_\_\_
- None (3)

**Pr4\_A1bTEXT** -- given above choice, text for 'please specify' is recorded here

What other activities or experiences have you participated in to introduce you to research? (Select all that apply)

- Pr4\_A2a** Introductory coursework on theories/concepts specific to your discipline
- Pr4\_A2b** Research methods coursework
- Pr4\_A2c** Seminars, lectures, or symposia on research in your discipline
- Pr4\_A2d** Independent study on research in your discipline
- Pr4\_A2e** Lab work assisting with research
- Pr4\_A2f** Research support activities for faculty (e.g., literature reviews, summaries, online searches, etc.)
- Pr4\_A2g** Assistantship or internship (e.g., research, teaching, tutoring, etc.)
- Pr4\_A2h** On-campus research conferences
- Pr4\_A2i** Discipline-specific club or organization
- Pr4\_A2j** Off-campus research conferences
- Pr4\_A2k** Visits to graduate schools offering programs in your discipline
- Pr4\_A2l** Other (please specify): \_\_\_\_ **Pr4\_A2ITEXT** \_\_\_\_\_

**Pr4\_A3** During your 2014 summer research experience, how do you plan to integrate or utilize any of the experience or skills you have gained through your undergraduate coursework?

**As you get ready for your summer program, we have a few questions about your understanding of mentoring and support activities.**

**Pr4\_A5** Have you communicated with your faculty research mentor prior to the start of the 2014 SR-EIP/LAMI program?

- Yes (1)
- No (2)

If No Is Selected, Then Skip To **Pr4\_B2...** *In thinking about the research experience...*

**Pr4\_A6** Which of the following describes your communication with your mentor?

- Received written materials about the research program in which you will participate (1)
- Received a reading assignment (2)
- Exchanged emails about research activities for the summer (3)
- Exchanged emails about schedules and logistics for the summer program (4)
- Other (please specify): (5) \_\_\_\_ **[ Pr4\_A6TEXT ]** \_\_\_\_\_

In thinking about the research experience you will be engaged in this summer, please consider the following ways your mentor may interact with you and indicate the importance of each to you.

|                |                                                                                                                    | Very important<br>(1) | Somewhat important<br>(2) | Not very important<br>(3) | Not at all important<br>(4) |
|----------------|--------------------------------------------------------------------------------------------------------------------|-----------------------|---------------------------|---------------------------|-----------------------------|
| <b>Pr4_B2a</b> | Availability to discuss and respond to questions about your research.                                              | <input type="radio"/> | <input type="radio"/>     | <input type="radio"/>     | <input type="radio"/>       |
| <b>Pr4_B2b</b> | Offering guidance and advice on your research.                                                                     | <input type="radio"/> | <input type="radio"/>     | <input type="radio"/>     | <input type="radio"/>       |
| <b>Pr4_B2c</b> | Showing interest in your research and be supportive of your ideas.                                                 | <input type="radio"/> | <input type="radio"/>     | <input type="radio"/>     | <input type="radio"/>       |
| <b>Pr4_B2d</b> | Helping you establish relationships by introducing you to other faculty, graduate students and researchers.        | <input type="radio"/> | <input type="radio"/>     | <input type="radio"/>     | <input type="radio"/>       |
| <b>Pr4_B2e</b> | Helping you make the distinction between undergraduate research and large scale projects in a research university. | <input type="radio"/> | <input type="radio"/>     | <input type="radio"/>     | <input type="radio"/>       |
| <b>Pr4_B2f</b> | Making you feel like an integral part of the research project.                                                     | <input type="radio"/> | <input type="radio"/>     | <input type="radio"/>     | <input type="radio"/>       |
| <b>Pr4_B2g</b> | Introducing you to a range of methodological techniques in research.                                               | <input type="radio"/> | <input type="radio"/>     | <input type="radio"/>     | <input type="radio"/>       |
| <b>Pr4_B2h</b> | Providing you with constructive feedback on your academic career development.                                      | <input type="radio"/> | <input type="radio"/>     | <input type="radio"/>     | <input type="radio"/>       |

**In this final section, we want to know a bit more about your preparation and plans for building upon your summer research experience.**

Please indicate your level of knowledge about each of the following topics:

|                |                                                                                               | None<br>(1)           | Beginning<br>(2)      | Intermediate<br>(3)   | High<br>(4)           |
|----------------|-----------------------------------------------------------------------------------------------|-----------------------|-----------------------|-----------------------|-----------------------|
| <b>Pr4_C1a</b> | The overall research process                                                                  | <input type="radio"/> | <input type="radio"/> | <input type="radio"/> | <input type="radio"/> |
| <b>Pr4_C1b</b> | Professional aspects of research                                                              | <input type="radio"/> | <input type="radio"/> | <input type="radio"/> | <input type="radio"/> |
| <b>Pr4_C1c</b> | Ethical aspects of research                                                                   | <input type="radio"/> | <input type="radio"/> | <input type="radio"/> | <input type="radio"/> |
| <b>Pr4_C1d</b> | Literature and basic concepts in your research area                                           | <input type="radio"/> | <input type="radio"/> | <input type="radio"/> | <input type="radio"/> |
| <b>Pr4_C1e</b> | Quantitative techniques and methods for data gathering                                        | <input type="radio"/> | <input type="radio"/> | <input type="radio"/> | <input type="radio"/> |
| <b>Pr4_C1f</b> | Approaches to quantitative data analysis                                                      | <input type="radio"/> | <input type="radio"/> | <input type="radio"/> | <input type="radio"/> |
| <b>Pr4_C1g</b> | Qualitative techniques and methods for data gathering                                         | <input type="radio"/> | <input type="radio"/> | <input type="radio"/> | <input type="radio"/> |
| <b>Pr4_C1h</b> | Approaches to qualitative data analysis                                                       | <input type="radio"/> | <input type="radio"/> | <input type="radio"/> | <input type="radio"/> |
| <b>Pr4_C1i</b> | Computer applications for data management and analysis (e.g., SPSS, STATA, SAS, NVIVO, etc.)  | <input type="radio"/> | <input type="radio"/> | <input type="radio"/> | <input type="radio"/> |
| <b>Pr4_C1j</b> | Bibliographic/reference software that manages research citations (e.g., EndNote and RefWorks) | <input type="radio"/> | <input type="radio"/> | <input type="radio"/> | <input type="radio"/> |
| <b>Pr4_C1k</b> | Critical reading skills and tools for the analysis of text                                    | <input type="radio"/> | <input type="radio"/> | <input type="radio"/> | <input type="radio"/> |
| <b>Pr4_C1l</b> | Data mining techniques (e.g., text mining and stemmatic analysis)                             | <input type="radio"/> | <input type="radio"/> | <input type="radio"/> | <input type="radio"/> |
| <b>Pr4_C1m</b> | Techniques and tools for conducting archival research                                         | <input type="radio"/> | <input type="radio"/> | <input type="radio"/> | <input type="radio"/> |
| <b>Pr4_C1n</b> | Techniques for conducting individual and group interviews                                     | <input type="radio"/> | <input type="radio"/> | <input type="radio"/> | <input type="radio"/> |
| <b>Pr4_C1o</b> | Research report preparation                                                                   | <input type="radio"/> | <input type="radio"/> | <input type="radio"/> | <input type="radio"/> |
| <b>Pr4_C1p</b> | Research report presentation                                                                  | <input type="radio"/> | <input type="radio"/> | <input type="radio"/> | <input type="radio"/> |

Based on your knowledge and experiences to date, indicate your response to each of the following statements about graduate school.

|                |                                                                                                                                                   | Strongly agree (1)    | Agree (2)             | Disagree (3)          | Strongly Disagree (4) |
|----------------|---------------------------------------------------------------------------------------------------------------------------------------------------|-----------------------|-----------------------|-----------------------|-----------------------|
| <b>Pr4_E1a</b> | I have a solid understanding of the graduate school application process                                                                           | <input type="radio"/> | <input type="radio"/> | <input type="radio"/> | <input type="radio"/> |
| <b>Pr4_E1b</b> | I have a solid understanding of graduate school life                                                                                              | <input type="radio"/> | <input type="radio"/> | <input type="radio"/> | <input type="radio"/> |
| <b>Pr4_E1c</b> | My discussions with faculty, postdocs and graduate students this summer will help me make informed decisions about graduate school and my future. | <input type="radio"/> | <input type="radio"/> | <input type="radio"/> | <input type="radio"/> |
| <b>Pr4_E1d</b> | I have a solid understanding of the careers available to me in my discipline.                                                                     | <input type="radio"/> | <input type="radio"/> | <input type="radio"/> | <input type="radio"/> |
| <b>Pr4_E1e</b> | I plan to pursue an academic career.                                                                                                              | <input type="radio"/> | <input type="radio"/> | <input type="radio"/> | <input type="radio"/> |
| <b>Pr4_E1f</b> | I plan to pursue a research career outside academia                                                                                               | <input type="radio"/> | <input type="radio"/> | <input type="radio"/> | <input type="radio"/> |
| <b>Pr4_E2a</b> | I plan to attend graduate school to pursue a PhD.                                                                                                 | <input type="radio"/> | <input type="radio"/> | <input type="radio"/> | <input type="radio"/> |
| <b>Pr4_E2b</b> | I plan to attend graduate school to pursue a MD-PhD degree.                                                                                       | <input type="radio"/> | <input type="radio"/> | <input type="radio"/> | <input type="radio"/> |
| <b>Pr4_E2c</b> | I plan to attend graduate school to pursue a Master's degree.                                                                                     | <input type="radio"/> | <input type="radio"/> | <input type="radio"/> | <input type="radio"/> |

**Pr4\_F1** How do you believe your research experiences to date will be enhanced during the SR-EIP/LAMI summer research program?

**Pr4\_F2** Overall, what do you hope to gain from your Leadership Alliance summer research experience?

## 2014 SR-EIP/LAMI Evaluation Post-Survey

### Program Preparation, Schedule and Context

Please rate your program with regard to the following activities to prepare you for your summer experience...

|                |                                                                                                                                 | Excellent<br>(1)      | Good<br>(3)           | Fair<br>(4)           | Poor<br>(5)           |
|----------------|---------------------------------------------------------------------------------------------------------------------------------|-----------------------|-----------------------|-----------------------|-----------------------|
| <b>Po4_A1a</b> | Prompt notification from research institution regarding your acceptance into the program                                        | <input type="radio"/> | <input type="radio"/> | <input type="radio"/> | <input type="radio"/> |
| <b>Po4_A1b</b> | Timely information on program logistics (e.g., key contact personnel, schedule, housing, transportation, local community, etc.) | <input type="radio"/> | <input type="radio"/> | <input type="radio"/> | <input type="radio"/> |
| <b>Po4_A1c</b> | Timely communication of mentor information (e.g., mentor contact information, department, etc.)                                 | <input type="radio"/> | <input type="radio"/> | <input type="radio"/> | <input type="radio"/> |
| <b>Po4_A1d</b> | On-site orientation to overall summer program (e.g., research site, campus services, facilities, policies, community, etc.)     | <input type="radio"/> | <input type="radio"/> | <input type="radio"/> | <input type="radio"/> |

What types of materials specific to your research project did you receive prior to the start of the 2014 SR-EIP-LAMI?

|                  |                                                                                                               | Selected (1)          |
|------------------|---------------------------------------------------------------------------------------------------------------|-----------------------|
| <b>Pro4_A6a1</b> | Informational materials to inform you about your mentor's department, program team, research activities, etc. | <input type="radio"/> |
| <b>Pro4_A6a2</b> | A specific reading assignment related to your mentor's area of research                                       | <input type="radio"/> |
| <b>Pro4_A6a3</b> | Published articles or research papers to inform you about your mentor's area of research                      | <input type="radio"/> |
| <b>Pro4_A6a4</b> | Other: please specify [ <b>Pro4_A6a4TXT</b> ]                                                                 | <input type="radio"/> |



Regarding the material(s) you received prior to the start of your SR-EIP/LAMI...

|                  |                                                                                                                                                                                                                                                                                                                 | Yes<br>(1)            | No<br>(2)             |
|------------------|-----------------------------------------------------------------------------------------------------------------------------------------------------------------------------------------------------------------------------------------------------------------------------------------------------------------|-----------------------|-----------------------|
| <b>Pro4_A6b1</b> | If <b>Pro4_A6a2</b> What types of materials specific to your research project did you receive prior to the start of the 2014 SR-EIP-LAMI? -- a specific reading assignment related to your mentor's area of research Is Selected<br>Did you complete the pre-reading assignment?                                | <input type="radio"/> | <input type="radio"/> |
| <b>Pro4_A6b2</b> | If <b>Pro4_A6a2</b> What types of materials specific to your research project did you receive prior to the start of the 2014 SR-EIP-LAMI? -- a specific reading assignment related to your mentor's area of research Is Selected<br>Were you required to submit a written report on the pre-reading assignment? | <input type="radio"/> | <input type="radio"/> |
| <b>Pro4_A6b3</b> | Did you engage in one-on-one discussion of the material?                                                                                                                                                                                                                                                        | <input type="radio"/> | <input type="radio"/> |
| <b>Pro4_A6b4</b> | Did you engage in small group discussion of the material?                                                                                                                                                                                                                                                       | <input type="radio"/> | <input type="radio"/> |

How useful did you find the ....

|                  |                                                                                                                                                                                                                                                                                                                                                                            | Very<br>useful<br>(1) | Moderately<br>useful<br>(2) | Not<br>very<br>useful<br>(3) | Not at<br>all<br>useful<br>(4) |
|------------------|----------------------------------------------------------------------------------------------------------------------------------------------------------------------------------------------------------------------------------------------------------------------------------------------------------------------------------------------------------------------------|-----------------------|-----------------------------|------------------------------|--------------------------------|
| <b>Pro4_A6c1</b> | If <b>Pro4_A6a1</b> What types of materials specific to your research project did you receive prior to the start of the 2014 SR-EIP-LAMI? -- informational materials to inform you about your mentor's department, program team, research activities, etc. Is Selected<br>Informational materials about your mentor's department, program team, research activities, etc.? | <input type="radio"/> | <input type="radio"/>       | <input type="radio"/>        | <input type="radio"/>          |
| <b>Pro4_A6c2</b> | If <b>Pro4_A6a2</b> What types of materials specific to your research project did you receive prior to the start of the 2014 SR-EIP-LAMI? -- a specific reading assignment related to your mentor's area of research Is Selected<br>The pre-reading assignment?                                                                                                            | <input type="radio"/> | <input type="radio"/>       | <input type="radio"/>        | <input type="radio"/>          |
| <b>Pro4_A6c3</b> | If <b>Pro4_A6a3</b> What types of materials specific to your research project did you receive prior to the start of the 2014 SR-EIP-LAMI? -- published articles or research papers to inform you about your mentor's area of research Is Selected<br>Published articles or research papers about your mentor's area of research?                                           | <input type="radio"/> | <input type="radio"/>       | <input type="radio"/>        | <input type="radio"/>          |
| <b>Pro4_A6c4</b> | If <b>Pro4_A6a4</b> What types of materials specific to your research project did you receive prior to the start of the 2014 SR-EIP-LAMI? -- Other Is Selected<br>Other materials?                                                                                                                                                                                         | <input type="radio"/> | <input type="radio"/>       | <input type="radio"/>        | <input type="radio"/>          |

**Po4\_A7** Did you receive a reading assignment(s) during the 2014 SR-EIP/LAMI?

- Yes (1)
- No (2)

If No Is Selected, Then Skip To **Po4\_A8a**. *During your SR-EIP/LAMI experience...*

Regarding the reading assignment(s) you received during your SR-EIP/LAMI...

|                 |                                                                 | Yes (1)               | No (2)                |
|-----------------|-----------------------------------------------------------------|-----------------------|-----------------------|
| <b>Po4_A7a1</b> | Did you complete the assignment?                                | <input type="radio"/> | <input type="radio"/> |
| <b>Po4_A7a2</b> | Were you required to submit a written report on the assignment? | <input type="radio"/> | <input type="radio"/> |
| <b>Po4_A7a3</b> | Did you engage in one-on-one discussion of the readings?        | <input type="radio"/> | <input type="radio"/> |
| <b>Po4_A7a4</b> | Did you engage in small group discussion of the readings?       | <input type="radio"/> | <input type="radio"/> |

**Po4\_A7b** How useful did you find the reading assignment(s) provided during your program?

- Very useful (1)
- Moderately useful (2)
- Not very useful (3)
- Not at all useful (4)

During your SR-EIP/LAMI experience, how many hours each week did you typically spend on the following?

|                |                                                                                                                                                | 20<br>hours<br>or more<br>(1) | 10-19<br>hours<br>(2) | 5-9<br>hours<br>(3)   | Less<br>than 5<br>hours<br>(4) | NA<br>(5)             |
|----------------|------------------------------------------------------------------------------------------------------------------------------------------------|-------------------------------|-----------------------|-----------------------|--------------------------------|-----------------------|
| <b>Po4_A8a</b> | Lectures                                                                                                                                       | <input type="radio"/>         | <input type="radio"/> | <input type="radio"/> | <input type="radio"/>          | <input type="radio"/> |
| <b>Po4_A8b</b> | Formal seminars and symposia                                                                                                                   | <input type="radio"/>         | <input type="radio"/> | <input type="radio"/> | <input type="radio"/>          | <input type="radio"/> |
| <b>Po4_A8c</b> | Small group discussions                                                                                                                        | <input type="radio"/>         | <input type="radio"/> | <input type="radio"/> | <input type="radio"/>          | <input type="radio"/> |
| <b>Po4_A8d</b> | Study groups                                                                                                                                   | <input type="radio"/>         | <input type="radio"/> | <input type="radio"/> | <input type="radio"/>          | <input type="radio"/> |
| <b>Po4_A8e</b> | One-on-one tutorials                                                                                                                           | <input type="radio"/>         | <input type="radio"/> | <input type="radio"/> | <input type="radio"/>          | <input type="radio"/> |
| <b>Po4_A8f</b> | Laboratory work                                                                                                                                | <input type="radio"/>         | <input type="radio"/> | <input type="radio"/> | <input type="radio"/>          | <input type="radio"/> |
| <b>Po4_A8g</b> | Library/museum work                                                                                                                            | <input type="radio"/>         | <input type="radio"/> | <input type="radio"/> | <input type="radio"/>          | <input type="radio"/> |
| <b>Po4_A8h</b> | Data gathering                                                                                                                                 | <input type="radio"/>         | <input type="radio"/> | <input type="radio"/> | <input type="radio"/>          | <input type="radio"/> |
| <b>Po4_A8i</b> | Data analysis                                                                                                                                  | <input type="radio"/>         | <input type="radio"/> | <input type="radio"/> | <input type="radio"/>          | <input type="radio"/> |
| <b>Po4_A8j</b> | Preparation of research presentation                                                                                                           | <input type="radio"/>         | <input type="radio"/> | <input type="radio"/> | <input type="radio"/>          | <input type="radio"/> |
| <b>Po4_A8k</b> | Professional development activities (e.g., GRE exam preparation, financial aid for graduate school, graduate school application process, etc.) | <input type="radio"/>         | <input type="radio"/> | <input type="radio"/> | <input type="radio"/>          | <input type="radio"/> |
| <b>Po4_A8l</b> | Social events or gatherings                                                                                                                    | <input type="radio"/>         | <input type="radio"/> | <input type="radio"/> | <input type="radio"/>          | <input type="radio"/> |
| <b>Po4_A8m</b> | Other research-related activities (please specify): [ <b>Po4_A8mTXT</b> ]                                                                      | <input type="radio"/>         | <input type="radio"/> | <input type="radio"/> | <input type="radio"/>          | <input type="radio"/> |

## Mentoring and Support

**Po4\_B1** For your SR-EIP/LAMI, who served as your primary research mentor?

- Faculty mentor (1)
- Postdoctoral research mentor (2)
- Graduate student mentor (3)
- Other (please specify): (4) \_\_\_\_\_ **Po4\_B1TEXT** \_\_\_\_\_

Based on the contact with your primary research mentor, how would you rate him/her on the following qualities?

|                 |                                                                                                                   | Excellent<br>(1)      | Good<br>(2)           | Fair<br>(3)           | Poor<br>(4)           |
|-----------------|-------------------------------------------------------------------------------------------------------------------|-----------------------|-----------------------|-----------------------|-----------------------|
| <b>Pro4_B2a</b> | Being available to discuss and respond to questions about your research                                           | <input type="radio"/> | <input type="radio"/> | <input type="radio"/> | <input type="radio"/> |
| <b>Pro4_B2b</b> | Offering guidance and advice on your research                                                                     | <input type="radio"/> | <input type="radio"/> | <input type="radio"/> | <input type="radio"/> |
| <b>Pro4_B2c</b> | Showing interest in your research and being supportive of your ideas                                              | <input type="radio"/> | <input type="radio"/> | <input type="radio"/> | <input type="radio"/> |
| <b>Pro4_B2d</b> | Helping you establish relationships by introducing you to other faculty, graduate students and researchers        | <input type="radio"/> | <input type="radio"/> | <input type="radio"/> | <input type="radio"/> |
| <b>Pro4_B2e</b> | Helping you make the distinction between undergraduate research and large-scale projects in a research university | <input type="radio"/> | <input type="radio"/> | <input type="radio"/> | <input type="radio"/> |
| <b>Pro4_B2f</b> | Making you feel like an integral part of the research project.                                                    | <input type="radio"/> | <input type="radio"/> | <input type="radio"/> | <input type="radio"/> |
| <b>Pro4_B2g</b> | Introducing you to a range of methodological techniques in research                                               | <input type="radio"/> | <input type="radio"/> | <input type="radio"/> | <input type="radio"/> |
| <b>Pro4_B2h</b> | Providing you with constructive feedback on your academic career development.                                     | <input type="radio"/> | <input type="radio"/> | <input type="radio"/> | <input type="radio"/> |
| <b>Pro4_B2i</b> | Giving you a good sense of how your project fit within the overall goals of the project                           | <input type="radio"/> | <input type="radio"/> | <input type="radio"/> | <input type="radio"/> |
| <b>Pro4_B2j</b> | Demonstrating knowledge/expertise in your field                                                                   | <input type="radio"/> | <input type="radio"/> | <input type="radio"/> | <input type="radio"/> |

*NOTE: Pro4\_B2i and Pro4\_B2j were not included on pre-survey*

**Po4\_B3** Please rate your overall satisfaction with your primary research mentor.

- Very satisfied (1)
- Somewhat satisfied (2)
- Somewhat dissatisfied (3)
- Very dissatisfied (4)

**Po4\_B4a** How likely is it that you will ask your primary research mentor for a letter of recommendation when you apply for a graduate program?

- Very likely (1)
- Somewhat likely (2)
- Somewhat unlikely (3)
- Not at all likely (4)

If *Very likely* Is Selected, Then Skip To **Po4\_B5a** *If your primary research...*

If *Somewhat likely* Is Selected, Then Skip To **Po4\_B5a** *If your primary research...*

**Po4\_B4b** Please explain why you would not ask your primary research mentor for a letter of recommendation.

Answer If **Po4\_B1** *For your SR-EIP/LAMI, who served as your primary ... Faculty mentor* Is Not Selected

**Po4\_B5a** If your primary research mentor was a graduate student or postdoc, how likely is it that you will ask your faculty mentor for a letter of recommendation?

- Very likely (1)
- Somewhat likely (2)
- Somewhat unlikely (3)
- Not at all likely (4)
- NA (5)

If *Very Likely* Is Selected, Then Skip To **Po4\_B6a...** *During the next academic year,...*

If *Somewhat Likely* Is Selected, Then Skip To **Po4\_B6a...** *During the next academic year,...*

Answer If **Po4\_B1** *For your SR-EIP/LAMI, who served as your primary ... Faculty mentor* Is Not Selected

**Po4\_B5b** Please explain why you would not ask your faculty mentor for a letter of recommendation.

During the next academic year, how likely are you to keep in touch with the various individuals you met at your summer research site?

|                |                                               | Very likely (1)       | Somewhat likely (2)   | Somewhat unlikely (3) | Not at all likely (4) | NA (5)                |
|----------------|-----------------------------------------------|-----------------------|-----------------------|-----------------------|-----------------------|-----------------------|
| <b>Po4_B6a</b> | Your faculty mentor                           | <input type="radio"/> |
| <b>Po4_B6b</b> | Postdoctoral fellow(s)                        | <input type="radio"/> |
| <b>Po4_B6c</b> | Graduate student(s)                           | <input type="radio"/> |
| <b>Po4_B6d</b> | SR-EIP summer program coordinator             | <input type="radio"/> |
| <b>Po4_B6e</b> | Other SR-EIP/LAMI students                    | <input type="radio"/> |
| <b>Po4_B6f</b> | Other (please specify): [ <b>Po4_B6fTXT</b> ] | <input type="radio"/> |

**Po4\_B7** How has the guidance you received from your mentor and others at your summer research site influenced your future choices and plans?

## Research Experience and Impact

Now that you have participated in the 2014 SR-EIP/LAMI, please indicate your current level of knowledge about each of the following topics:

|                 |                                                                                                      | None<br>(1)           | Beginning<br>(2)      | Intermediate<br>(3)   | High<br>(4)           |
|-----------------|------------------------------------------------------------------------------------------------------|-----------------------|-----------------------|-----------------------|-----------------------|
| <b>Pro4_C1a</b> | The overall research process                                                                         | <input type="radio"/> | <input type="radio"/> | <input type="radio"/> | <input type="radio"/> |
| <b>Pro4_C1b</b> | Professional aspects of research                                                                     | <input type="radio"/> | <input type="radio"/> | <input type="radio"/> | <input type="radio"/> |
| <b>Pro4_C1c</b> | Ethical aspects of research                                                                          | <input type="radio"/> | <input type="radio"/> | <input type="radio"/> | <input type="radio"/> |
| <b>Pro4_C1d</b> | Literature and basic concepts in your research area                                                  | <input type="radio"/> | <input type="radio"/> | <input type="radio"/> | <input type="radio"/> |
| <b>Pro4_C1e</b> | Quantitative techniques and methods for data gathering                                               | <input type="radio"/> | <input type="radio"/> | <input type="radio"/> | <input type="radio"/> |
| <b>Pro4_C1f</b> | Approaches to quantitative data analysis                                                             | <input type="radio"/> | <input type="radio"/> | <input type="radio"/> | <input type="radio"/> |
| <b>Pro4_C1g</b> | Qualitative techniques and methods for data gathering                                                | <input type="radio"/> | <input type="radio"/> | <input type="radio"/> | <input type="radio"/> |
| <b>Pro4_C1h</b> | Approaches to qualitative data analysis                                                              | <input type="radio"/> | <input type="radio"/> | <input type="radio"/> | <input type="radio"/> |
| <b>Pro4_C1i</b> | Computer applications for data management and analysis (e.g., SPSS, STATA, SAS, NVIVO, MATLAB, etc.) | <input type="radio"/> | <input type="radio"/> | <input type="radio"/> | <input type="radio"/> |
| <b>Pro4_C1j</b> | Bibliographic/reference software that manages research citations (e.g., EndNote and RefWorks)        | <input type="radio"/> | <input type="radio"/> | <input type="radio"/> | <input type="radio"/> |
| <b>Pro4_C1k</b> | Critical reading skills and tools for the analysis of text                                           | <input type="radio"/> | <input type="radio"/> | <input type="radio"/> | <input type="radio"/> |
| <b>Pro4_C1l</b> | Data mining techniques (such as text mining and stemmatic analysis)                                  | <input type="radio"/> | <input type="radio"/> | <input type="radio"/> | <input type="radio"/> |
| <b>Pro4_C1m</b> | Techniques and tools for conducting archival research                                                | <input type="radio"/> | <input type="radio"/> | <input type="radio"/> | <input type="radio"/> |
| <b>Pro4_C1n</b> | Techniques for conducting individual and/or group interviews                                         | <input type="radio"/> | <input type="radio"/> | <input type="radio"/> | <input type="radio"/> |
| <b>Pro4_C1o</b> | Research report preparation                                                                          | <input type="radio"/> | <input type="radio"/> | <input type="radio"/> | <input type="radio"/> |
| <b>Pro4_C1p</b> | Research report presentation                                                                         | <input type="radio"/> | <input type="radio"/> | <input type="radio"/> | <input type="radio"/> |

**Answer If TLAstat Is Not Equal to LAMI**

Listed below are statements about methodological techniques and skills employed in conducting research. Based on your research experiences this summer, indicate the extent to which you agree with each of the following statements:

|                |                                                                                                                                                           | Strongly agree<br>(1) | Agree<br>(2)          | Disagree<br>(3)       | Strongly disagree<br>(4) | Not applicable to my discipline<br>(5) |
|----------------|-----------------------------------------------------------------------------------------------------------------------------------------------------------|-----------------------|-----------------------|-----------------------|--------------------------|----------------------------------------|
| <b>Po4_C2a</b> | I attended a library orientation and became familiar with the scholarly resources available.                                                              | <input type="radio"/> | <input type="radio"/> | <input type="radio"/> | <input type="radio"/>    | <input type="radio"/>                  |
| <b>Po4_C2b</b> | I was provided with new techniques to sharpen my critical reading skills and tools for the analysis of text.                                              | <input type="radio"/> | <input type="radio"/> | <input type="radio"/> | <input type="radio"/>    | <input type="radio"/>                  |
| <b>Po4_C2c</b> | I was provided training on methodological techniques.                                                                                                     | <input type="radio"/> | <input type="radio"/> | <input type="radio"/> | <input type="radio"/>    | <input type="radio"/>                  |
| <b>Po4_C2d</b> | I was provided the opportunity to discuss the methodological approaches and overall results of current journal articles with fellow students and faculty. | <input type="radio"/> | <input type="radio"/> | <input type="radio"/> | <input type="radio"/>    | <input type="radio"/>                  |

**Po4\_C3** How has your research experience this summer enhanced the research and methodological skills you possessed before attending SR-EIP/LAMI?

Thinking about your research, workshops, and seminar experiences this summer, how true would you say the following statements are for you?

|                |                                                                                                      | Very true<br>(1)      | Somewhat true<br>(2)  | Not very true<br>(3)  | Not at all true<br>(4) |
|----------------|------------------------------------------------------------------------------------------------------|-----------------------|-----------------------|-----------------------|------------------------|
| <b>Po4_C4a</b> | My experiences this summer are relevant to my research work at my current undergraduate institution. | <input type="radio"/> | <input type="radio"/> | <input type="radio"/> | <input type="radio"/>  |
| <b>Po4_C4b</b> | The skills I learned this summer will help me with future coursework.                                | <input type="radio"/> | <input type="radio"/> | <input type="radio"/> | <input type="radio"/>  |
| <b>Po4_C4c</b> | The skills I learned this summer will enhance my senior thesis/research projects and/or papers.      | <input type="radio"/> | <input type="radio"/> | <input type="radio"/> | <input type="radio"/>  |
| <b>Po4_C4d</b> | My experiences this summer have inspired me to take new courses that I had not considered before.    | <input type="radio"/> | <input type="radio"/> | <input type="radio"/> | <input type="radio"/>  |
| <b>Po4_C4e</b> | My experiences this summer will enhance my overall undergraduate experience.                         | <input type="radio"/> | <input type="radio"/> | <input type="radio"/> | <input type="radio"/>  |

Answer If TLAstat Is Not Equal to LAMI

Listed below are statements about the possible impact of the methodological techniques and skills introduced to you during SR-EIP. Based on your experiences, indicate your response to each of the following statements:

|                |                                                                                                              | Strongly agree<br>(1) | Agree<br>(2)          | Disagree<br>(3)       | Strongly disagree<br>(4) | Not applicable to my discipline<br>(5) |
|----------------|--------------------------------------------------------------------------------------------------------------|-----------------------|-----------------------|-----------------------|--------------------------|----------------------------------------|
| <b>Po4_C5a</b> | My critical thinking skills were enhanced through my research and dialogue with fellow students and faculty. | <input type="radio"/> | <input type="radio"/> | <input type="radio"/> | <input type="radio"/>    | <input type="radio"/>                  |
| <b>Po4_C5b</b> | I increased my ability to learn on my own, pursue ideas, and find information I need.                        | <input type="radio"/> | <input type="radio"/> | <input type="radio"/> | <input type="radio"/>    | <input type="radio"/>                  |
| <b>Po4_C5c</b> | I further developed and improved my research writing skills.                                                 | <input type="radio"/> | <input type="radio"/> | <input type="radio"/> | <input type="radio"/>    | <input type="radio"/>                  |
| <b>Po4_C5d</b> | My analytical and critical reading skills were sharpened.                                                    | <input type="radio"/> | <input type="radio"/> | <input type="radio"/> | <input type="radio"/>    | <input type="radio"/>                  |
| <b>Po4_C5e</b> | I am better equipped to put ideas together, see relationships, similarities, and differences between ideas.  | <input type="radio"/> | <input type="radio"/> | <input type="radio"/> | <input type="radio"/>    | <input type="radio"/>                  |
| <b>Po4_C5f</b> | I learned new techniques that enhanced my methodological skills.                                             | <input type="radio"/> | <input type="radio"/> | <input type="radio"/> | <input type="radio"/>    | <input type="radio"/>                  |
| <b>Po4_C5g</b> | I have developed the necessary vocabulary of my discipline to engage in critical dialogue.                   | <input type="radio"/> | <input type="radio"/> | <input type="radio"/> | <input type="radio"/>    | <input type="radio"/>                  |
| <b>Po4_C5h</b> | I learned how to adapt to change (e.g., new technologies, different jobs or personal circumstances, etc.).   | <input type="radio"/> | <input type="radio"/> | <input type="radio"/> | <input type="radio"/>    | <input type="radio"/>                  |

Please indicate how useful your SR-EIP/LAMI experience was in the following areas:

|                |                                                                        | Very useful<br>(1)    | Somewhat useful<br>(2) | Not at all useful<br>(3) | NA<br>(4)             |
|----------------|------------------------------------------------------------------------|-----------------------|------------------------|--------------------------|-----------------------|
| <b>Po4_C6a</b> | Increasing my readiness to engage in demanding research                | <input type="radio"/> | <input type="radio"/>  | <input type="radio"/>    | <input type="radio"/> |
| <b>Po4_C6b</b> | Improving my self-confidence as a researcher                           | <input type="radio"/> | <input type="radio"/>  | <input type="radio"/>    | <input type="radio"/> |
| <b>Po4_C6c</b> | Becoming part of a learning community                                  | <input type="radio"/> | <input type="radio"/>  | <input type="radio"/>    | <input type="radio"/> |
| <b>Po4_C6d</b> | Understanding more clearly what it takes to become a researcher        | <input type="radio"/> | <input type="radio"/>  | <input type="radio"/>    | <input type="radio"/> |
| <b>Po4_C6e</b> | Gaining confidence in communicating my research to a national audience | <input type="radio"/> | <input type="radio"/>  | <input type="radio"/>    | <input type="radio"/> |



**Po4\_F1** Please describe below your most positive experience during SR-EIP/LAMI.

**Po4\_F2** Please describe below your most negative experience during SR--EIP/LAMI.

## Professional Development

During your SR-EIP/LAMI, how often did you discuss the following topics with others at your research site and/or at other campuses?

|                |                                                       | Often<br>(1)          | Occasionally<br>(2)   | Never<br>(3)          |
|----------------|-------------------------------------------------------|-----------------------|-----------------------|-----------------------|
| <b>Po4_D1a</b> | Research interests                                    | <input type="radio"/> | <input type="radio"/> | <input type="radio"/> |
| <b>Po4_D1b</b> | Information about research project                    | <input type="radio"/> | <input type="radio"/> | <input type="radio"/> |
| <b>Po4_D1c</b> | Information about host department or research mentors | <input type="radio"/> | <input type="radio"/> | <input type="radio"/> |
| <b>Po4_D1d</b> | Applying to graduate school                           | <input type="radio"/> | <input type="radio"/> | <input type="radio"/> |
| <b>Po4_D1e</b> | Information about graduate student life               | <input type="radio"/> | <input type="radio"/> | <input type="radio"/> |
| <b>Po4_D1f</b> | Choosing a career                                     | <input type="radio"/> | <input type="radio"/> | <input type="radio"/> |
| <b>Po4_D1g</b> | Combining a career with personal life                 | <input type="radio"/> | <input type="radio"/> | <input type="radio"/> |
| <b>Po4_D1h</b> | What it takes to be a researcher in my discipline     | <input type="radio"/> | <input type="radio"/> | <input type="radio"/> |
| <b>Po4_D1i</b> | What it means to be an academic                       | <input type="radio"/> | <input type="radio"/> | <input type="radio"/> |
| <b>Po4_D1j</b> | Plans to meet at symposium                            | <input type="radio"/> | <input type="radio"/> | <input type="radio"/> |
| <b>Po4_D1k</b> | Other (Please specify): [ <b>Po4_D1kTXT</b> ]         | <input type="radio"/> | <input type="radio"/> | <input type="radio"/> |

A number of training or informational opportunities are provided during Alliance summer research programs. From the following list, please indicate those provided to you:

|                 |                                                                                                                            | Selected (1)          |
|-----------------|----------------------------------------------------------------------------------------------------------------------------|-----------------------|
| <b>Po4_D2a1</b> | Instruction on presentation style and effective communication                                                              | <input type="radio"/> |
| <b>Po4_D2a2</b> | Skill building in making an oral research presentation                                                                     | <input type="radio"/> |
| <b>Po4_D2a3</b> | Skill building in making a poster presentation of my research                                                              | <input type="radio"/> |
| <b>Po4_D2a4</b> | Information on effective strategies for getting my research published                                                      | <input type="radio"/> |
| <b>Po4_D2a5</b> | Professional guidance on resume development, career options, interviewing skills and related career development strategies | <input type="radio"/> |
| <b>Po4_D2a6</b> | Discussion and advice about maintaining balance between my academic and personal life                                      | <input type="radio"/> |
| <b>Po4_D2a7</b> | Clarification regarding the progression through graduate school and towards the PhD or MD-PhD                              | <input type="radio"/> |
| <b>Po4_D2a8</b> | Information about the availability of fellowships, assistantships, and other support for graduate school                   | <input type="radio"/> |

Please indicate the usefulness of the training and information provided to you?

|                 |                                                                                                                            | Very useful<br>(1)    | Useful<br>(2)         | Not too useful<br>(3) | Not at all useful<br>(4) |
|-----------------|----------------------------------------------------------------------------------------------------------------------------|-----------------------|-----------------------|-----------------------|--------------------------|
| <b>Po4_D2b1</b> | Instruction on presentation style and effective communication                                                              | <input type="radio"/> | <input type="radio"/> | <input type="radio"/> | <input type="radio"/>    |
| <b>Po4_D2b2</b> | Skill building in making an oral research presentation                                                                     | <input type="radio"/> | <input type="radio"/> | <input type="radio"/> | <input type="radio"/>    |
| <b>Po4_D2b3</b> | Skill building in making a poster presentation of my research                                                              | <input type="radio"/> | <input type="radio"/> | <input type="radio"/> | <input type="radio"/>    |
| <b>Po4_D2b4</b> | Information on effective strategies for getting my research published                                                      | <input type="radio"/> | <input type="radio"/> | <input type="radio"/> | <input type="radio"/>    |
| <b>Po4_D2b5</b> | Professional guidance on resume development, career options, interviewing skills and related career development strategies | <input type="radio"/> | <input type="radio"/> | <input type="radio"/> | <input type="radio"/>    |
| <b>Po4_D2b6</b> | Discussion and advice about maintaining balance between my academic and personal life                                      | <input type="radio"/> | <input type="radio"/> | <input type="radio"/> | <input type="radio"/>    |
| <b>Po4_D2b7</b> | Clarification regarding the progression through graduate school and towards the PhD or MD-PhD                              | <input type="radio"/> | <input type="radio"/> | <input type="radio"/> | <input type="radio"/>    |
| <b>Po4_D2b8</b> | Information about the availability of fellowships, assistantships, and other support for graduate school                   | <input type="radio"/> | <input type="radio"/> | <input type="radio"/> | <input type="radio"/>    |

## Graduate School and Future Plans

Based on your experiences and knowledge gained through SR-EIP, indicate your level of agreement with each of the following statements **about graduate school**:

|                 |                                                                                                                                           | Strongly agree<br>(1) | Agree<br>(2)          | Disagree<br>(3)       | Strongly disagree<br>(4) |
|-----------------|-------------------------------------------------------------------------------------------------------------------------------------------|-----------------------|-----------------------|-----------------------|--------------------------|
| <b>Pro4_E1a</b> | I have a solid understanding of the graduate school application process.                                                                  | <input type="radio"/> | <input type="radio"/> | <input type="radio"/> | <input type="radio"/>    |
| <b>Pro4_E1b</b> | I have a solid understanding of graduate student life.                                                                                    | <input type="radio"/> | <input type="radio"/> | <input type="radio"/> | <input type="radio"/>    |
| <b>Pro4_E1c</b> | My discussions with faculty, post-docs, and graduate students will help me make an informed decision about graduate school and my future. | <input type="radio"/> | <input type="radio"/> | <input type="radio"/> | <input type="radio"/>    |
| <b>Pro4_E1g</b> | Overall, I am more confident about planning for my graduate school education.                                                             | <input type="radio"/> | <input type="radio"/> | <input type="radio"/> | <input type="radio"/>    |

Based on your experiences and knowledge gained through SR-EIP, indicate your level of agreement with each of the following statements **about career path/plans**.

|                 |                                                                                                | Strongly agree<br>(1) | Agree<br>(2)          | Disagree<br>(3)       | Strongly disagree<br>(4) |
|-----------------|------------------------------------------------------------------------------------------------|-----------------------|-----------------------|-----------------------|--------------------------|
| <b>Pro4_E1d</b> | I have a solid understanding of the careers available to me in this field.                     | <input type="radio"/> | <input type="radio"/> | <input type="radio"/> | <input type="radio"/>    |
| <b>Pro4_E1e</b> | I plan to pursue an academic career.                                                           | <input type="radio"/> | <input type="radio"/> | <input type="radio"/> | <input type="radio"/>    |
| <b>Pro4_E1f</b> | I plan to pursue a research career outside of academia.                                        | <input type="radio"/> | <input type="radio"/> | <input type="radio"/> | <input type="radio"/>    |
| <b>Pro4_E1h</b> | Overall, I am more confident about planning for a career in research.                          | <input type="radio"/> | <input type="radio"/> | <input type="radio"/> | <input type="radio"/>    |
| <b>Pro4_E3a</b> | I have clarified my career path.                                                               | <input type="radio"/> | <input type="radio"/> | <input type="radio"/> | <input type="radio"/>    |
| <b>Pro4_E3b</b> | I had a plan to pursue a research career before I began SR--EIP, and the plan has not changed. | <input type="radio"/> | <input type="radio"/> | <input type="radio"/> | <input type="radio"/>    |
| <b>Pro4_E3c</b> | My commitment to pursue a research career is stronger.                                         | <input type="radio"/> | <input type="radio"/> | <input type="radio"/> | <input type="radio"/>    |
| <b>Pro4_E3d</b> | I will probably change my major to better position me to pursue a research career.             | <input type="radio"/> | <input type="radio"/> | <input type="radio"/> | <input type="radio"/>    |

*NOTE: Pro4\_E1g and Pro4\_E1h are not on the pre-survey.*

**Pro4\_E2** Which of the following best describes your plans for graduate school within 3 years after completing your undergraduate degree?

- I plan to attend graduate school to pursue a Masters degree. (1)
- I plan to attend graduate school to pursue a PhD. (2)
- I plan to attend graduate school to pursue a MD-PhD. (3)
- I plan to attend graduate school to pursue another professional/doctoral degree program. (4)
- I do not plan to attend graduate school. (5)

NOTE: Pro4\_E2 is asked separately for the following choices on the pre-survey: PhD (Pr4\_E2a), MD-PhD (Pr4\_E2b) and masters (Pr4\_E2c)

What is your status regarding the following exams?

|                |                                               | Already taken<br>(1)  | Plan to take<br>(2)   | Do not plan to take<br>(3) | Not sure<br>(4)       |
|----------------|-----------------------------------------------|-----------------------|-----------------------|----------------------------|-----------------------|
| <b>Po4_E4a</b> | MCAT (Medical College Admission Test)         | <input type="radio"/> | <input type="radio"/> | <input type="radio"/>      | <input type="radio"/> |
| <b>Po4_E4b</b> | GRE (Graduate Record Exam)                    | <input type="radio"/> | <input type="radio"/> | <input type="radio"/>      | <input type="radio"/> |
| <b>Po4_E4c</b> | LSAT (Law School Admission Test)              | <input type="radio"/> | <input type="radio"/> | <input type="radio"/>      | <input type="radio"/> |
| <b>Po4_E4d</b> | GMAT (Graduate Management Admission Test)     | <input type="radio"/> | <input type="radio"/> | <input type="radio"/>      | <input type="radio"/> |
| <b>Po4_E4e</b> | Other (please specify): [ <b>Po4_E4eTXT</b> ] | <input type="radio"/> | <input type="radio"/> | <input type="radio"/>      | <input type="radio"/> |

**Po4\_E5** How much impact has the SR-EIP/LAMI had on how you view your future plans?

- A great deal (1)
- Some (2)
- A little (3)
- None (4)

**2015 SR-EIP and LAMI Pre-Survey**

**Undergraduates have many different experiences before participating in Leadership Alliance programs. The next few items are included to find out more about these experiences.**

**Pr5\_A1** Have you ever participated in an undergraduate research program prior to the 2015 SR-EIP/LAMI?

- Yes (1)
- No (2)

If No Is Selected, Then Skip To **Pr5\_A2** *What other activities or experiences...*

How many times prior to summer 2015 have you participated in the following programs?

|                                                                                           | 3+ (Times) (1)        | 2 (2)                 | 1 (Time) (3)          | NA (4)                |
|-------------------------------------------------------------------------------------------|-----------------------|-----------------------|-----------------------|-----------------------|
| <b>Pr5_A1a1</b> Leadership Alliance Summer Research Early Identification Program (SR-EIP) | <input type="radio"/> | <input type="radio"/> | <input type="radio"/> | <input type="radio"/> |
| <b>Pr5_A1a2</b> Leadership Alliance Mellon Initiative (LAMI)                              | <input type="radio"/> | <input type="radio"/> | <input type="radio"/> | <input type="radio"/> |
| <b>Pr5_A1a3</b> CIC Summer Research Opportunities Program                                 | <input type="radio"/> | <input type="radio"/> | <input type="radio"/> | <input type="radio"/> |
| <b>Pr5_A1a4</b> Amgen Scholars Program                                                    | <input type="radio"/> | <input type="radio"/> | <input type="radio"/> | <input type="radio"/> |
| <b>Pr5_A1a5</b> Mellon Mays Undergraduate Fellowship (MMUF) Program                       | <input type="radio"/> | <input type="radio"/> | <input type="radio"/> | <input type="radio"/> |
| <b>Pr5_A1a6</b> Minority Access to Research Careers (MARC) Program                        | <input type="radio"/> | <input type="radio"/> | <input type="radio"/> | <input type="radio"/> |

**Pr5\_A1b** Please specify any other undergraduate research or academic enrichment programs in which you currently participate or have participated in:

- At your home institution (please specify): \_\_\_\_\_ (1)
- External to your home institution (please specify): \_\_\_\_\_ (2)
- None (3)

**Pr5\_A1bTEXT** -- given above choice, text for 'please specify' is recorded here

What other activities or experiences have you participated in to introduce you to research? (Select all that apply)

- Pr5\_A2a** Introductory coursework on theories/concepts specific to your discipline
- Pr5\_A2b** Research methods coursework
- Pr5\_A2c** Seminars, lectures, or symposia on research in your discipline
- Pr5\_A2d** Independent study on research in your discipline
- Pr5\_A2e** Lab work assisting with research
- Pr5\_A2f** Research support activities for faculty (e.g., literature reviews, summaries, online searches, etc.)
- Pr5\_A2g** Assistantship or internship (e.g., research, teaching, tutoring, etc.)
- Pr5\_A2h** On-campus research conferences
- Pr5\_A2i** Discipline-specific club or organization
- Pr5\_A2j** Off-campus research conferences
- Pr5\_A2k** Visits to graduate schools offering programs in your discipline
- Pr5\_A2l** Other (please specify): \_\_\_\_ **Pr5\_A2ITEXT** \_\_\_\_\_

**Pr5\_A3** During your 2015 summer research experience, how do you plan to integrate or utilize any of the experience or skills you have gained through your undergraduate coursework?

**As you get ready for your summer program, we have a few questions about your understanding of mentoring and support activities.**

**Pr5\_A5** Have you communicated with your faculty research mentor prior to the start of the 2015 SR-EIP/LAMI program?

- Yes (1)
- No (2)

If No Is Selected, Then Skip To **Pr5\_B2** In thinking about the research experience...

**Pr5\_A6** Which of the following describes your communication with your mentor?

- Received written materials about the research program in which you will participate (1)
- Received a reading assignment (2)
- Exchanged emails about research activities for the summer (3)
- Exchanged emails about schedules and logistics for the summer program (4)
- Other (please specify): (5) \_\_\_\_ **Pr5\_A6TEXT** \_\_\_\_

In thinking about the research experience you will be engaged in this summer, please consider the following ways your mentor may interact with you and indicate the importance of each to you.

|                 |                                                                                                                    | Very important<br>(1) | Somewhat important<br>(2) | Not very important<br>(3) | Not at all important<br>(4) |
|-----------------|--------------------------------------------------------------------------------------------------------------------|-----------------------|---------------------------|---------------------------|-----------------------------|
| <b>Pr5_B2a</b>  | Availability to discuss and respond to questions about your research.                                              | <input type="radio"/> | <input type="radio"/>     | <input type="radio"/>     | <input type="radio"/>       |
| <b>Pr5_B2b</b>  | Offering guidance and advice on your research.                                                                     | <input type="radio"/> | <input type="radio"/>     | <input type="radio"/>     | <input type="radio"/>       |
| <b>Pr5_B2c.</b> | Showing interest in your research and be supportive of your ideas.                                                 | <input type="radio"/> | <input type="radio"/>     | <input type="radio"/>     | <input type="radio"/>       |
| <b>Pr5_B2d</b>  | Helping you establish relationships by introducing you to other faculty, graduate students and researchers.        | <input type="radio"/> | <input type="radio"/>     | <input type="radio"/>     | <input type="radio"/>       |
| <b>Pr5_B2e</b>  | Helping you make the distinction between undergraduate research and large scale projects in a research university. | <input type="radio"/> | <input type="radio"/>     | <input type="radio"/>     | <input type="radio"/>       |
| <b>Pr5_B2f</b>  | Making you feel like an integral part of the research project.                                                     | <input type="radio"/> | <input type="radio"/>     | <input type="radio"/>     | <input type="radio"/>       |
| <b>Pr5_B2g</b>  | Introducing you to a range of methodological techniques in research.                                               | <input type="radio"/> | <input type="radio"/>     | <input type="radio"/>     | <input type="radio"/>       |
| <b>Pr5_B2h</b>  | Providing you with constructive feedback on your academic career development.                                      | <input type="radio"/> | <input type="radio"/>     | <input type="radio"/>     | <input type="radio"/>       |



**In this final section, we want to know a bit more about your preparation and plans for building upon your summer research experience.**

Please indicate your level of knowledge about each of the following topics:

|                |                                                                                               | None<br>(1)           | Beginning<br>(2)      | Intermediate<br>(3)   | High<br>(4)           |
|----------------|-----------------------------------------------------------------------------------------------|-----------------------|-----------------------|-----------------------|-----------------------|
| <b>Pr5_C1a</b> | The overall research process                                                                  | <input type="radio"/> | <input type="radio"/> | <input type="radio"/> | <input type="radio"/> |
| <b>Pr5_C1b</b> | Professional aspects of research                                                              | <input type="radio"/> | <input type="radio"/> | <input type="radio"/> | <input type="radio"/> |
| <b>Pr5_C1c</b> | Ethical aspects of research                                                                   | <input type="radio"/> | <input type="radio"/> | <input type="radio"/> | <input type="radio"/> |
| <b>Pr5_C1d</b> | Literature and basic concepts in your research area                                           | <input type="radio"/> | <input type="radio"/> | <input type="radio"/> | <input type="radio"/> |
| <b>Pr5_C1e</b> | Quantitative techniques and methods for data gathering                                        | <input type="radio"/> | <input type="radio"/> | <input type="radio"/> | <input type="radio"/> |
| <b>Pr5_C1f</b> | Approaches to quantitative data analysis                                                      | <input type="radio"/> | <input type="radio"/> | <input type="radio"/> | <input type="radio"/> |
| <b>Pr5_C1g</b> | Qualitative techniques and methods for data gathering                                         | <input type="radio"/> | <input type="radio"/> | <input type="radio"/> | <input type="radio"/> |
| <b>Pr5_C1h</b> | Approaches to qualitative data analysis                                                       | <input type="radio"/> | <input type="radio"/> | <input type="radio"/> | <input type="radio"/> |
| <b>Pr5_C1i</b> | Computer applications for data management and analysis (e.g., SPSS, STATA, SAS, NVIVO, etc.)  | <input type="radio"/> | <input type="radio"/> | <input type="radio"/> | <input type="radio"/> |
| <b>Pr5_C1j</b> | Bibliographic/reference software that manages research citations (e.g., EndNote and RefWorks) | <input type="radio"/> | <input type="radio"/> | <input type="radio"/> | <input type="radio"/> |
| <b>Pr5_C1k</b> | Critical reading skills and tools for the analysis of text                                    | <input type="radio"/> | <input type="radio"/> | <input type="radio"/> | <input type="radio"/> |
| <b>Pr5_C1l</b> | Data mining techniques (e.g., text mining and stemmatic analysis)                             | <input type="radio"/> | <input type="radio"/> | <input type="radio"/> | <input type="radio"/> |
| <b>Pr5_C1m</b> | Techniques and tools for conducting archival research                                         | <input type="radio"/> | <input type="radio"/> | <input type="radio"/> | <input type="radio"/> |
| <b>Pr5_C1n</b> | Techniques for conducting individual and group interviews                                     | <input type="radio"/> | <input type="radio"/> | <input type="radio"/> | <input type="radio"/> |
| <b>Pr5_C1o</b> | Research report preparation                                                                   | <input type="radio"/> | <input type="radio"/> | <input type="radio"/> | <input type="radio"/> |
| <b>Pr5_C1p</b> | Research report presentation                                                                  | <input type="radio"/> | <input type="radio"/> | <input type="radio"/> | <input type="radio"/> |

Based on your knowledge and experiences to date, indicate your response to each of the following statements about graduate school.

|                                                                                                                                                                  | Strongly agree (1)    | Agree (2)             | Disagree (3)          | Strongly Disagree (4) |
|------------------------------------------------------------------------------------------------------------------------------------------------------------------|-----------------------|-----------------------|-----------------------|-----------------------|
| <b>Pr5_E1a</b> I have a solid understanding of the graduate school application process                                                                           | <input type="radio"/> | <input type="radio"/> | <input type="radio"/> | <input type="radio"/> |
| <b>Pr5_E1b</b> I have a solid understanding of graduate school life                                                                                              | <input type="radio"/> | <input type="radio"/> | <input type="radio"/> | <input type="radio"/> |
| <b>Pr5_E1c</b> My discussions with faculty, postdocs and graduate students this summer will help me make informed decisions about graduate school and my future. | <input type="radio"/> | <input type="radio"/> | <input type="radio"/> | <input type="radio"/> |
| <b>Pr5_E1d</b> I have a solid understanding of the careers available to me in my discipline.                                                                     | <input type="radio"/> | <input type="radio"/> | <input type="radio"/> | <input type="radio"/> |
| <b>Pr5_E1e</b> I plan to pursue an academic career.                                                                                                              | <input type="radio"/> | <input type="radio"/> | <input type="radio"/> | <input type="radio"/> |
| <b>Pr5_E1f</b> I plan to pursue a research career outside academia.                                                                                              | <input type="radio"/> | <input type="radio"/> | <input type="radio"/> | <input type="radio"/> |
| <b>Pr5_E2a</b> I plan to attend graduate school to pursue a PhD.                                                                                                 | <input type="radio"/> | <input type="radio"/> | <input type="radio"/> | <input type="radio"/> |
| <b>Pr5_E2b</b> I plan to attend graduate school to pursue a MD-PhD degree.                                                                                       | <input type="radio"/> | <input type="radio"/> | <input type="radio"/> | <input type="radio"/> |
| <b>Pr5_E2c</b> I plan to attend graduate school to pursue a Master's degree.                                                                                     | <input type="radio"/> | <input type="radio"/> | <input type="radio"/> | <input type="radio"/> |

**Pr5\_F1** How do you believe your research experiences to date will be enhanced during the SR-EIP/LAMI summer research program?

**Pr5\_F2** Overall, what do you hope to gain from your Leadership Alliance summer research experience?

## 2015 SR-EIP/LAMI Post-Survey

### Program Preparation, Schedule and Context

Please rate your program with regard to the following activities to prepare you for your summer experience...

|                |                                                                                                                                 | Excellent<br>(1)      | Good<br>(3)           | Fair<br>(4)           | Poor<br>(5)           |
|----------------|---------------------------------------------------------------------------------------------------------------------------------|-----------------------|-----------------------|-----------------------|-----------------------|
| <b>Po5_A1a</b> | Prompt notification from research institution regarding your acceptance into the program                                        | <input type="radio"/> | <input type="radio"/> | <input type="radio"/> | <input type="radio"/> |
| <b>Po5_A1b</b> | Timely information on program logistics (e.g., key contact personnel, schedule, housing, transportation, local community, etc.) | <input type="radio"/> | <input type="radio"/> | <input type="radio"/> | <input type="radio"/> |
| <b>Po5_A1c</b> | Timely communication of mentor information (e.g., mentor contact information, department, etc.)                                 | <input type="radio"/> | <input type="radio"/> | <input type="radio"/> | <input type="radio"/> |
| <b>Po5_A1d</b> | On-site orientation to overall summer program (e.g., research site, campus services, facilities, policies, community, etc.)     | <input type="radio"/> | <input type="radio"/> | <input type="radio"/> | <input type="radio"/> |

What types of materials specific to your research project did you receive prior to the start of the 2015 SR-EIP-LAMI?

|                  |                                                                                                               | Selected (1)          |
|------------------|---------------------------------------------------------------------------------------------------------------|-----------------------|
| <b>Pro5_A6a1</b> | Informational materials to inform you about your mentor's department, program team, research activities, etc. | <input type="radio"/> |
| <b>Pro5_A6a2</b> | A specific reading assignment related to your mentor's area of research                                       | <input type="radio"/> |
| <b>Pro5_A6a3</b> | Published articles or research papers to inform you about your mentor's area of research                      | <input type="radio"/> |
| <b>Pro5_A6a4</b> | Other: please specify [ Pro5_A6a4TXT ]                                                                        | <input type="radio"/> |

Regarding the material(s) you received prior to the start of your SR-EIP/LAMI...

|                  |                                                                                                                                                                                                                                                                                                                | Yes<br>(1)            | No<br>(2)             |
|------------------|----------------------------------------------------------------------------------------------------------------------------------------------------------------------------------------------------------------------------------------------------------------------------------------------------------------|-----------------------|-----------------------|
| <b>Pro5_A6b1</b> | If <b>Pro5_A6a2</b> What types of materials specific to your research project did you receive prior to the start of the 2015 SR-EIP-LAMI -- a specific reading assignment related to your mentor's area of research Is Selected<br>Did you complete the pre-reading assignment?                                | <input type="radio"/> | <input type="radio"/> |
| <b>Pro5_A6b2</b> | If <b>Pro5_A6a2</b> What types of materials specific to your research project did you receive prior to the start of the 2015 SR-EIP-LAMI -- a specific reading assignment related to your mentor's area of research Is Selected<br>Were you required to submit a written report on the pre-reading assignment? | <input type="radio"/> | <input type="radio"/> |
| <b>Pro5_A6b3</b> | Did you engage in one-on-one discussion of the material?                                                                                                                                                                                                                                                       | <input type="radio"/> | <input type="radio"/> |
| <b>Pro5_A6b4</b> | Did you engage in small group discussion of the material?                                                                                                                                                                                                                                                      | <input type="radio"/> | <input type="radio"/> |

How useful did you find the ....

|                  |                                                                                                                                                                                                                                                                                                                                                                            | Very<br>useful<br>(1) | Moderately<br>useful<br>(2) | Not<br>very<br>useful<br>(3) | Not at<br>all<br>useful<br>(4) |
|------------------|----------------------------------------------------------------------------------------------------------------------------------------------------------------------------------------------------------------------------------------------------------------------------------------------------------------------------------------------------------------------------|-----------------------|-----------------------------|------------------------------|--------------------------------|
| <b>Pro5_A6c1</b> | If <b>Pro5_A6a1</b> What types of materials specific to your research project did you receive prior to the start of the 2015 SR-EIP-LAMI? -- informational materials to inform you about your mentor's department, program team, research activities, etc. Is Selected<br>Informational materials about your mentor's department, program team, research activities, etc.? | <input type="radio"/> | <input type="radio"/>       | <input type="radio"/>        | <input type="radio"/>          |
| <b>Pro5_A6c2</b> | If <b>Pro5_A6a2</b> What types of materials specific to your research project did you receive prior to the start of the 2015 SR-EIP-LAMI? -- a specific reading assignment related to your mentor's area of research Is Selected<br>The pre-reading assignment?                                                                                                            | <input type="radio"/> | <input type="radio"/>       | <input type="radio"/>        | <input type="radio"/>          |
| <b>Pro5_A6c3</b> | If <b>Pro5_A6a3</b> What types of materials specific to your research project did you receive prior to the start of the 2015 SR-EIP-LAMI? -- published articles or research papers to inform you about your mentor's area of research Is Selected<br>Published articles or research papers about your mentor's area of research?                                           | <input type="radio"/> | <input type="radio"/>       | <input type="radio"/>        | <input type="radio"/>          |
| <b>Pro5_A6c4</b> | If <b>Pro5_A6a4</b> What types of materials specific to your research project did you receive prior to the start of the 2015 SR-EIP-LAMI? -- Other: please specify Is Selected<br>Other materials?                                                                                                                                                                         | <input type="radio"/> | <input type="radio"/>       | <input type="radio"/>        | <input type="radio"/>          |

**Po5\_A7** Did you receive a reading assignment(s) during the 2015 SR-EIP/LAMI?

- Yes (1)
- No (2)

If No Is Selected, Then Skip To II-4 **Po5\_A8a...** During your SR-EIP/LAMI experience...

Regarding the reading assignment(s) you received during your SR-EIP/LAMI...

|                 |                                                                 | Yes (1)               | No (2)                |
|-----------------|-----------------------------------------------------------------|-----------------------|-----------------------|
| <b>Po5_A7a1</b> | Did you complete the assignment?                                | <input type="radio"/> | <input type="radio"/> |
| <b>Po5_A7a2</b> | Were you required to submit a written report on the assignment? | <input type="radio"/> | <input type="radio"/> |
| <b>Po5_A7a3</b> | Did you engage in one-on-one discussion of the readings?        | <input type="radio"/> | <input type="radio"/> |
| <b>Po5_A7a4</b> | Did you engage in small group discussion of the readings?       | <input type="radio"/> | <input type="radio"/> |

**Po5\_A7b** How useful did you find the reading assignment(s) provided during your program?

- Very useful (1)
- Moderately useful (2)
- Not very useful (3)
- Not at all useful (4)

During your SR-EIP/LAMI experience, how many hours each week did you typically spend on the following?

|                |                                                                                                                                                            | 20 hours<br>or more<br>(1) | 10-19<br>hours<br>(2) | 5-9<br>hours<br>(3)   | Less than<br>5 hours<br>(4) | NA<br>(5)             |
|----------------|------------------------------------------------------------------------------------------------------------------------------------------------------------|----------------------------|-----------------------|-----------------------|-----------------------------|-----------------------|
| <b>Po5_A8a</b> | Lectures                                                                                                                                                   | <input type="radio"/>      | <input type="radio"/> | <input type="radio"/> | <input type="radio"/>       | <input type="radio"/> |
| <b>Po5_A8b</b> | Formal seminars and symposia                                                                                                                               | <input type="radio"/>      | <input type="radio"/> | <input type="radio"/> | <input type="radio"/>       | <input type="radio"/> |
| <b>Po5_A8c</b> | Small group discussions                                                                                                                                    | <input type="radio"/>      | <input type="radio"/> | <input type="radio"/> | <input type="radio"/>       | <input type="radio"/> |
| <b>Po5_A8d</b> | Study groups                                                                                                                                               | <input type="radio"/>      | <input type="radio"/> | <input type="radio"/> | <input type="radio"/>       | <input type="radio"/> |
| <b>Po5_A8e</b> | One-on-one tutorials                                                                                                                                       | <input type="radio"/>      | <input type="radio"/> | <input type="radio"/> | <input type="radio"/>       | <input type="radio"/> |
| <b>Po5_A8f</b> | Laboratory work                                                                                                                                            | <input type="radio"/>      | <input type="radio"/> | <input type="radio"/> | <input type="radio"/>       | <input type="radio"/> |
| <b>Po5_A8g</b> | Library/museum work                                                                                                                                        | <input type="radio"/>      | <input type="radio"/> | <input type="radio"/> | <input type="radio"/>       | <input type="radio"/> |
| <b>Po5_A8h</b> | Data gathering                                                                                                                                             | <input type="radio"/>      | <input type="radio"/> | <input type="radio"/> | <input type="radio"/>       | <input type="radio"/> |
| <b>Po5_A8i</b> | Data analysis                                                                                                                                              | <input type="radio"/>      | <input type="radio"/> | <input type="radio"/> | <input type="radio"/>       | <input type="radio"/> |
| <b>Po5_A8j</b> | Preparation of research<br>presentation                                                                                                                    | <input type="radio"/>      | <input type="radio"/> | <input type="radio"/> | <input type="radio"/>       | <input type="radio"/> |
| <b>Po5_A8k</b> | Professional development activities<br>(e.g., GRE exam preparation,<br>financial aid for graduate school,<br>graduate school application<br>process, etc.) | <input type="radio"/>      | <input type="radio"/> | <input type="radio"/> | <input type="radio"/>       | <input type="radio"/> |
| <b>Po5_A8l</b> | Social events or gatherings                                                                                                                                | <input type="radio"/>      | <input type="radio"/> | <input type="radio"/> | <input type="radio"/>       | <input type="radio"/> |
| <b>Po5_A8m</b> | Other research-related activities<br>(please specify): <b>Po5_A8mTXT</b>                                                                                   | <input type="radio"/>      | <input type="radio"/> | <input type="radio"/> | <input type="radio"/>       | <input type="radio"/> |

## Mentoring and Support

**Po5\_B1** For your SR-EIP/LAMI, who served as your primary research mentor?

- Faculty mentor (1)
- Postdoctoral research mentor (2)
- Graduate student mentor (3)
- Other (please specify): (4) [ **Po5\_B1TEXT** ]

Based on the contact with your primary research mentor, how would you rate him/her on the following qualities?

|                 |                                                                                                                   | Excellent<br>(1)      | Good<br>(2)           | Fair<br>(3)           | Poor<br>(4)           |
|-----------------|-------------------------------------------------------------------------------------------------------------------|-----------------------|-----------------------|-----------------------|-----------------------|
| <b>Pro5_B2a</b> | Being available to discuss and respond to questions about your research                                           | <input type="radio"/> | <input type="radio"/> | <input type="radio"/> | <input type="radio"/> |
| <b>Pro5_B2b</b> | Offering guidance and advice on your research                                                                     | <input type="radio"/> | <input type="radio"/> | <input type="radio"/> | <input type="radio"/> |
| <b>Pro5_B2c</b> | Showing interest in your research and being supportive of your ideas                                              | <input type="radio"/> | <input type="radio"/> | <input type="radio"/> | <input type="radio"/> |
| <b>Pro5_B2d</b> | Helping you establish relationships by introducing you to other faculty, graduate students and researchers        | <input type="radio"/> | <input type="radio"/> | <input type="radio"/> | <input type="radio"/> |
| <b>Pro5_B2e</b> | Helping you make the distinction between undergraduate research and large-scale projects in a research university | <input type="radio"/> | <input type="radio"/> | <input type="radio"/> | <input type="radio"/> |
| <b>Pro5_B2f</b> | Making you feel like an integral part of the research project.                                                    | <input type="radio"/> | <input type="radio"/> | <input type="radio"/> | <input type="radio"/> |
| <b>Pro5_B2g</b> | Introducing you to a range of methodological techniques in research                                               | <input type="radio"/> | <input type="radio"/> | <input type="radio"/> | <input type="radio"/> |
| <b>Pro5_B2h</b> | Providing you with constructive feedback on your academic career development.                                     | <input type="radio"/> | <input type="radio"/> | <input type="radio"/> | <input type="radio"/> |
| <b>Pro5_B2i</b> | Giving you a good sense of how your project fit within the overall goals of the project                           | <input type="radio"/> | <input type="radio"/> | <input type="radio"/> | <input type="radio"/> |
| <b>Pro5_B2j</b> | Demonstrating knowledge/expertise in your field                                                                   | <input type="radio"/> | <input type="radio"/> | <input type="radio"/> | <input type="radio"/> |

*NOTE: Pro5\_B2i and Pro5\_B2j were not included on pre-survey*

**Po5\_B3** Please rate your overall satisfaction with your primary research mentor.

- Very satisfied (1)
- Somewhat satisfied (2)
- Somewhat dissatisfied (3)
- Very dissatisfied (4)

**Po5\_B4a** How likely is it that you will ask your primary research mentor for a letter of recommendation when you apply for a graduate program?

- Very likely (1)
- Somewhat likely (2)
- Somewhat unlikely (3)
- Not at all likely (4)

If *Very likely* Is Selected, Then Skip To **Po5\_B5a**. If your primary research mentor...If *Somewhat likely* Is Selected, Then Skip To **Po5\_B5a**. If your primary research...

**Po5\_B4b** Please explain why you would not ask your primary research mentor for a letter of recommendation.

Answer If **Po5\_B1**. For your SR-EIP/LAMI, who served as your primary research mentor...  
Faculty mentor Is Not Selected

**Po5\_B5a** If your primary research mentor was a graduate student or postdoc, how likely is it that you will ask your faculty mentor for a letter of recommendation?

- Very likely (1)
- Somewhat likely (2)
- Somewhat unlikely (3)
- Not at all likely (4)
- NA (5)

If *Very Likely* Is Selected, Then Skip To III-6 **Po5\_B6a**... During the next academic year,...If *Somewhat Likely* Is Selected, Then Skip To III-6 **Po5\_B6a**... During the next academic year,...

Answer If **Po5\_B1**. For your SR-EIP/LAMI, who served as your primary research mentor...  
Faculty mentor Is Not Selected

**Po5\_B5b** Please explain why you would not ask your faculty mentor for a letter of recommendation.

During the next academic year, how likely are you to keep in touch with the various individuals you met at your summer research site?

|                |                                             | Very likely<br>(1)    | Somewhat likely<br>(2) | Somewhat unlikely<br>(3) | Not at all likely<br>(4) | NA<br>(5)             |
|----------------|---------------------------------------------|-----------------------|------------------------|--------------------------|--------------------------|-----------------------|
| <b>Po5_B6a</b> | Your faculty mentor                         | <input type="radio"/> | <input type="radio"/>  | <input type="radio"/>    | <input type="radio"/>    | <input type="radio"/> |
| <b>Po5_B6b</b> | Postdoctoral fellow(s)                      | <input type="radio"/> | <input type="radio"/>  | <input type="radio"/>    | <input type="radio"/>    | <input type="radio"/> |
| <b>Po5_B6c</b> | Graduate student(s)                         | <input type="radio"/> | <input type="radio"/>  | <input type="radio"/>    | <input type="radio"/>    | <input type="radio"/> |
| <b>Po5_B6d</b> | SR-EIP summer program coordinator           | <input type="radio"/> | <input type="radio"/>  | <input type="radio"/>    | <input type="radio"/>    | <input type="radio"/> |
| <b>Po5_B6e</b> | Other SR-EIP/LAMI students                  | <input type="radio"/> | <input type="radio"/>  | <input type="radio"/>    | <input type="radio"/>    | <input type="radio"/> |
| <b>Po5_B6f</b> | Other (please specify): <b>[Po5_B6fTXT]</b> | <input type="radio"/> | <input type="radio"/>  | <input type="radio"/>    | <input type="radio"/>    | <input type="radio"/> |

**Po5\_B7** How has the guidance you received from your mentor and others at your summer research site influenced your future choices and plans?



## Research Experience and Impact

Now that you have participated in the 2015 SR-EIP/LAMI, please indicate your current level of knowledge about each of the following topics:

|                 |                                                                                                      | None<br>(1)           | Beginning<br>(2)      | Intermediate<br>(3)   | High<br>(4)           |
|-----------------|------------------------------------------------------------------------------------------------------|-----------------------|-----------------------|-----------------------|-----------------------|
| <b>Pro5_C1a</b> | The overall research process                                                                         | <input type="radio"/> | <input type="radio"/> | <input type="radio"/> | <input type="radio"/> |
| <b>Pro5_C1b</b> | Professional aspects of research                                                                     | <input type="radio"/> | <input type="radio"/> | <input type="radio"/> | <input type="radio"/> |
| <b>Pro5_C1c</b> | Ethical aspects of research                                                                          | <input type="radio"/> | <input type="radio"/> | <input type="radio"/> | <input type="radio"/> |
| <b>Pro5_C1d</b> | Literature and basic concepts in your research area                                                  | <input type="radio"/> | <input type="radio"/> | <input type="radio"/> | <input type="radio"/> |
| <b>Pro5_C1e</b> | Quantitative techniques and methods for data gathering                                               | <input type="radio"/> | <input type="radio"/> | <input type="radio"/> | <input type="radio"/> |
| <b>Pro5_C1f</b> | Approaches to quantitative data analysis                                                             | <input type="radio"/> | <input type="radio"/> | <input type="radio"/> | <input type="radio"/> |
| <b>Pro5_C1g</b> | Qualitative techniques and methods for data gathering                                                | <input type="radio"/> | <input type="radio"/> | <input type="radio"/> | <input type="radio"/> |
| <b>Pro5_C1h</b> | Approaches to qualitative data analysis                                                              | <input type="radio"/> | <input type="radio"/> | <input type="radio"/> | <input type="radio"/> |
| <b>Pro5_C1i</b> | Computer applications for data management and analysis (e.g., SPSS, STATA, SAS, NVIVO, MATLAB, etc.) | <input type="radio"/> | <input type="radio"/> | <input type="radio"/> | <input type="radio"/> |
| <b>Pro5_C1j</b> | Bibliographic/reference software that manages research citations (e.g., EndNote and RefWorks)        | <input type="radio"/> | <input type="radio"/> | <input type="radio"/> | <input type="radio"/> |
| <b>Pro5_C1k</b> | Critical reading skills and tools for the analysis of text                                           | <input type="radio"/> | <input type="radio"/> | <input type="radio"/> | <input type="radio"/> |
| <b>Pro5_C1l</b> | Data mining techniques (such as text mining and stemmatic analysis)                                  | <input type="radio"/> | <input type="radio"/> | <input type="radio"/> | <input type="radio"/> |
| <b>Pro5_C1m</b> | Techniques and tools for conducting archival research                                                | <input type="radio"/> | <input type="radio"/> | <input type="radio"/> | <input type="radio"/> |
| <b>Pro5_C1n</b> | Techniques for conducting individual and/or group interviews                                         | <input type="radio"/> | <input type="radio"/> | <input type="radio"/> | <input type="radio"/> |
| <b>Pro5_C1o</b> | Research report preparation                                                                          | <input type="radio"/> | <input type="radio"/> | <input type="radio"/> | <input type="radio"/> |
| <b>Pro5_C1p</b> | Research report presentation                                                                         | <input type="radio"/> | <input type="radio"/> | <input type="radio"/> | <input type="radio"/> |

**Answer If TLAstat Is Not Equal to LAMI**

Listed below are statements about methodological techniques and skills employed in conducting research. Based on your research experiences this summer, indicate the extent to which you agree with each of the following statements:

|                |                                                                                                                                                           | Strongly agree<br>(1) | Agree<br>(2)          | Disagree<br>(3)       | Strongly disagree<br>(4) | Not applicable to my discipline<br>(5) |
|----------------|-----------------------------------------------------------------------------------------------------------------------------------------------------------|-----------------------|-----------------------|-----------------------|--------------------------|----------------------------------------|
| <b>Po5_C2a</b> | I attended a library orientation and became familiar with the scholarly resources available.                                                              | <input type="radio"/> | <input type="radio"/> | <input type="radio"/> | <input type="radio"/>    | <input type="radio"/>                  |
| <b>Po5_C2b</b> | I was provided with new techniques to sharpen my critical reading skills and tools for the analysis of text.                                              | <input type="radio"/> | <input type="radio"/> | <input type="radio"/> | <input type="radio"/>    | <input type="radio"/>                  |
| <b>Po5_C2c</b> | I was provided training on methodological techniques.                                                                                                     | <input type="radio"/> | <input type="radio"/> | <input type="radio"/> | <input type="radio"/>    | <input type="radio"/>                  |
| <b>Po5_C2d</b> | I was provided the opportunity to discuss the methodological approaches and overall results of current journal articles with fellow students and faculty. | <input type="radio"/> | <input type="radio"/> | <input type="radio"/> | <input type="radio"/>    | <input type="radio"/>                  |

**Po5\_C3** How has your research experience this summer enhanced the research and methodological skills you possessed before attending SR-EIP/LAMI?

Thinking about your research, workshops, and seminar experiences this summer, how true would you say the following statements are for you?

|                |                                                                                                          | Very true<br>(1)      | Somewhat true<br>(2)  | Not very true<br>(3)  | Not at all true<br>(4) |
|----------------|----------------------------------------------------------------------------------------------------------|-----------------------|-----------------------|-----------------------|------------------------|
| <b>Po5_C4a</b> | My experiences this summer are relevant to my research work at my current undergraduate institution. (1) | <input type="radio"/> | <input type="radio"/> | <input type="radio"/> | <input type="radio"/>  |
| <b>Po5_C4b</b> | The skills I learned this summer will help me with future coursework. (2)                                | <input type="radio"/> | <input type="radio"/> | <input type="radio"/> | <input type="radio"/>  |
| <b>Po5_C4c</b> | The skills I learned this summer will enhance my senior thesis/research projects and/or papers. (3)      | <input type="radio"/> | <input type="radio"/> | <input type="radio"/> | <input type="radio"/>  |
| <b>Po5_C4d</b> | My experiences this summer have inspired me to take new courses that I had not considered before. (4)    | <input type="radio"/> | <input type="radio"/> | <input type="radio"/> | <input type="radio"/>  |
| <b>Po5_C4e</b> | My experiences this summer will enhance my overall undergraduate experience. (5)                         | <input type="radio"/> | <input type="radio"/> | <input type="radio"/> | <input type="radio"/>  |

**Answer If TLAstat Is Not Equal to LAMI**

Listed below are statements about the possible impact of the methodological techniques and skills introduced to you during SR-EIP. Based on your experiences, indicate your response to each of the following statements:

|                |                                                                                                              | Strongly agree<br>(1) | Agree<br>(2)          | Disagree<br>(3)       | Strongly disagree<br>(4) | Not applicable to my discipline<br>(5) |
|----------------|--------------------------------------------------------------------------------------------------------------|-----------------------|-----------------------|-----------------------|--------------------------|----------------------------------------|
| <b>Po5_C5a</b> | My critical thinking skills were enhanced through my research and dialogue with fellow students and faculty. | <input type="radio"/> | <input type="radio"/> | <input type="radio"/> | <input type="radio"/>    | <input type="radio"/>                  |
| <b>Po5_C5b</b> | I increased my ability to learn on my own, pursue ideas, and find information I need.                        | <input type="radio"/> | <input type="radio"/> | <input type="radio"/> | <input type="radio"/>    | <input type="radio"/>                  |
| <b>Po5_C5c</b> | I further developed and improved my research writing skills.                                                 | <input type="radio"/> | <input type="radio"/> | <input type="radio"/> | <input type="radio"/>    | <input type="radio"/>                  |
| <b>Po5_C5d</b> | My analytical and critical reading skills were sharpened.                                                    | <input type="radio"/> | <input type="radio"/> | <input type="radio"/> | <input type="radio"/>    | <input type="radio"/>                  |
| <b>Po5_C5e</b> | I am better equipped to put ideas together, see relationships, similarities, and differences between ideas.  | <input type="radio"/> | <input type="radio"/> | <input type="radio"/> | <input type="radio"/>    | <input type="radio"/>                  |
| <b>Po5_C5f</b> | I learned new techniques that enhanced my methodological skills.                                             | <input type="radio"/> | <input type="radio"/> | <input type="radio"/> | <input type="radio"/>    | <input type="radio"/>                  |
| <b>Po5_C5g</b> | I have developed the necessary vocabulary of my discipline to engage in critical dialogue.                   | <input type="radio"/> | <input type="radio"/> | <input type="radio"/> | <input type="radio"/>    | <input type="radio"/>                  |
| <b>Po5_C5h</b> | I learned how to adapt to change (e.g., new technologies, different jobs or personal circumstances, etc.).   | <input type="radio"/> | <input type="radio"/> | <input type="radio"/> | <input type="radio"/>    | <input type="radio"/>                  |

Please indicate how useful your SR-EIP/LAMI experience was in the following areas:

|                |                                                                        | Very useful (1)       | Somewhat useful (2)   | Not at all useful (3) | NA (4)                |
|----------------|------------------------------------------------------------------------|-----------------------|-----------------------|-----------------------|-----------------------|
| <b>Po5_C6a</b> | Increasing my readiness to engage in demanding research                | <input type="radio"/> | <input type="radio"/> | <input type="radio"/> | <input type="radio"/> |
| <b>Po5_C6b</b> | Improving my self-confidence as a researcher                           | <input type="radio"/> | <input type="radio"/> | <input type="radio"/> | <input type="radio"/> |
| <b>Po5_C6c</b> | Becoming part of a learning community                                  | <input type="radio"/> | <input type="radio"/> | <input type="radio"/> | <input type="radio"/> |
| <b>Po5_C6d</b> | Understanding more clearly what it takes to become a researcher        | <input type="radio"/> | <input type="radio"/> | <input type="radio"/> | <input type="radio"/> |
| <b>Po5_C6e</b> | Gaining confidence in communicating my research to a national audience | <input type="radio"/> | <input type="radio"/> | <input type="radio"/> | <input type="radio"/> |

**Po5\_F1** Please describe below your most positive experience during SR-EIP/LAMI.

**Po5\_F2** Please describe below your most negative experience during SR--EIP/LAMI.

## Professional Development

During your SR-EIP/LAMI, how often did you discuss the following topics with others at your research site and/or at other campuses?

|                |                                                       | Often<br>(1)          | Occasionally<br>(2)   | Never<br>(3)          |
|----------------|-------------------------------------------------------|-----------------------|-----------------------|-----------------------|
| <b>Po5_D1a</b> | Research interests                                    | <input type="radio"/> | <input type="radio"/> | <input type="radio"/> |
| <b>Po5_D1b</b> | Information about research project                    | <input type="radio"/> | <input type="radio"/> | <input type="radio"/> |
| <b>Po5_D1c</b> | Information about host department or research mentors | <input type="radio"/> | <input type="radio"/> | <input type="radio"/> |
| <b>Po5_D1d</b> | Applying to graduate school                           | <input type="radio"/> | <input type="radio"/> | <input type="radio"/> |
| <b>Po5_D1e</b> | Information about graduate student life               | <input type="radio"/> | <input type="radio"/> | <input type="radio"/> |
| <b>Po5_D1f</b> | Choosing a career                                     | <input type="radio"/> | <input type="radio"/> | <input type="radio"/> |
| <b>Po5_D1g</b> | Combining a career with personal life                 | <input type="radio"/> | <input type="radio"/> | <input type="radio"/> |
| <b>Po5_D1h</b> | What it takes to be a researcher in my discipline     | <input type="radio"/> | <input type="radio"/> | <input type="radio"/> |
| <b>Po5_D1i</b> | What it means to be an academic                       | <input type="radio"/> | <input type="radio"/> | <input type="radio"/> |
| <b>Po5_D1j</b> | Plans to meet at symposium                            | <input type="radio"/> | <input type="radio"/> | <input type="radio"/> |
| <b>Po5_D1k</b> | Other (Please specify): [ <b>Po5_D1kTXT</b> ]         | <input type="radio"/> | <input type="radio"/> | <input type="radio"/> |

A number of training or informational opportunities are provided during Alliance summer research programs. From the following list, please indicate those provided to you:

|                 |                                                                                                                            | Selected (1)          |
|-----------------|----------------------------------------------------------------------------------------------------------------------------|-----------------------|
| <b>Po5_D2a1</b> | Instruction on presentation style and effective communication                                                              | <input type="radio"/> |
| <b>Po5_D2a2</b> | Skill building in making an oral research presentation                                                                     | <input type="radio"/> |
| <b>Po5_D2a3</b> | Skill building in making a poster presentation of my research                                                              | <input type="radio"/> |
| <b>Po5_D2a4</b> | Information on effective strategies for getting my research published                                                      | <input type="radio"/> |
| <b>Po5_D2a5</b> | Professional guidance on resume development, career options, interviewing skills and related career development strategies | <input type="radio"/> |
| <b>Po5_D2a6</b> | Discussion and advice about maintaining balance between my academic and personal life                                      | <input type="radio"/> |
| <b>Po5_D2a7</b> | Clarification regarding the progression through graduate school and towards the PhD or MD-PhD                              | <input type="radio"/> |
| <b>Po5_D2a8</b> | Information about the availability of fellowships, assistantships, and other support for graduate school                   | <input type="radio"/> |

Please indicate the usefulness of the training and information provided to you?

|                 |                                                                                                                            | Very useful<br>(1)    | Useful<br>(2)         | Not too useful<br>(3) | Not at all useful<br>(4) |
|-----------------|----------------------------------------------------------------------------------------------------------------------------|-----------------------|-----------------------|-----------------------|--------------------------|
| <b>Po5_D2b1</b> | Instruction on presentation style and effective communication                                                              | <input type="radio"/> | <input type="radio"/> | <input type="radio"/> | <input type="radio"/>    |
| <b>Po5_D2b2</b> | Skill building in making an oral research presentation                                                                     | <input type="radio"/> | <input type="radio"/> | <input type="radio"/> | <input type="radio"/>    |
| <b>Po5_D2b3</b> | Skill building in making a poster presentation of my research                                                              | <input type="radio"/> | <input type="radio"/> | <input type="radio"/> | <input type="radio"/>    |
| <b>Po5_D2b4</b> | Information on effective strategies for getting my research published                                                      | <input type="radio"/> | <input type="radio"/> | <input type="radio"/> | <input type="radio"/>    |
| <b>Po5_D2b5</b> | Professional guidance on resume development, career options, interviewing skills and related career development strategies | <input type="radio"/> | <input type="radio"/> | <input type="radio"/> | <input type="radio"/>    |
| <b>Po5_D2b6</b> | Discussion and advice about maintaining balance between my academic and personal life                                      | <input type="radio"/> | <input type="radio"/> | <input type="radio"/> | <input type="radio"/>    |
| <b>Po5_D2b7</b> | Clarification regarding the progression through graduate school and towards the PhD or MD-PhD                              | <input type="radio"/> | <input type="radio"/> | <input type="radio"/> | <input type="radio"/>    |
| <b>Po5_D2b8</b> | Information about the availability of fellowships, assistantships, and other support for graduate school                   | <input type="radio"/> | <input type="radio"/> | <input type="radio"/> | <input type="radio"/>    |

## Graduate School and Future Plans

Based on your experiences and knowledge gained through SR-EIP, indicate your level of agreement with each of the following statements **about graduate school**:

|                 |                                                                                                                                           | Strongly agree<br>(1) | Agree<br>(2)          | Disagree<br>(3)       | Strongly disagree<br>(4) |
|-----------------|-------------------------------------------------------------------------------------------------------------------------------------------|-----------------------|-----------------------|-----------------------|--------------------------|
| <b>Pro5_E1a</b> | I have a solid understanding of the graduate school application process.                                                                  | <input type="radio"/> | <input type="radio"/> | <input type="radio"/> | <input type="radio"/>    |
| <b>Pro5_E1b</b> | I have a solid understanding of graduate student life.                                                                                    | <input type="radio"/> | <input type="radio"/> | <input type="radio"/> | <input type="radio"/>    |
| <b>Pro5_E1c</b> | My discussions with faculty, post-docs, and graduate students will help me make an informed decision about graduate school and my future. | <input type="radio"/> | <input type="radio"/> | <input type="radio"/> | <input type="radio"/>    |
| <b>Pro5_E1g</b> | Overall, I am more confident about planning for my graduate school education.                                                             | <input type="radio"/> | <input type="radio"/> | <input type="radio"/> | <input type="radio"/>    |

Based on your experiences and knowledge gained through SR-EIP, indicate your level of agreement with each of the following statements **about career path/plans**.

|                 |                                                                                                | Strongly agree<br>(1) | Agree<br>(2)          | Disagree<br>(3)       | Strongly disagree<br>(4) |
|-----------------|------------------------------------------------------------------------------------------------|-----------------------|-----------------------|-----------------------|--------------------------|
| <b>Pro5_E1d</b> | I have a solid understanding of the careers available to me in this field.                     | <input type="radio"/> | <input type="radio"/> | <input type="radio"/> | <input type="radio"/>    |
| <b>Pro5_E1e</b> | I plan to pursue an academic career.                                                           | <input type="radio"/> | <input type="radio"/> | <input type="radio"/> | <input type="radio"/>    |
| <b>Pro5_E1f</b> | I plan to pursue a research career outside of academia.                                        | <input type="radio"/> | <input type="radio"/> | <input type="radio"/> | <input type="radio"/>    |
| <b>Pro5_E1h</b> | Overall, I am more confident about planning for a career in research.                          | <input type="radio"/> | <input type="radio"/> | <input type="radio"/> | <input type="radio"/>    |
| <b>Po5_E3a</b>  | I have clarified my career path.                                                               | <input type="radio"/> | <input type="radio"/> | <input type="radio"/> | <input type="radio"/>    |
| <b>Po5_E3b</b>  | I had a plan to pursue a research career before I began SR--EIP, and the plan has not changed. | <input type="radio"/> | <input type="radio"/> | <input type="radio"/> | <input type="radio"/>    |
| <b>Po5_E3c</b>  | My commitment to pursue a research career is stronger.                                         | <input type="radio"/> | <input type="radio"/> | <input type="radio"/> | <input type="radio"/>    |
| <b>Po5_E3d</b>  | I will probably change my major to better position me to pursue a research career.             | <input type="radio"/> | <input type="radio"/> | <input type="radio"/> | <input type="radio"/>    |

*NOTE: Pro5\_E1g and Pro5\_E1h are not on the pre-survey.*

**Pro5\_E2** Which of the following best describes your plans for graduate school within 3 years after completing your undergraduate degree?

- I plan to attend graduate school to pursue a Master's degree. (1)
- I plan to attend graduate school to pursue a PhD. (2)
- I plan to attend graduate school to pursue a MD-PhD. (3)
- I plan to attend graduate school to pursue another professional/doctoral degree program. (4)
- I do not plan to attend graduate school. (5)

NOTE: Pro5\_E2 is asked separately for the following choices on the pre-survey: PhD (Pr5\_E2a), MD-PhD (Pr5\_E2b) and masters (Pr5\_E2c)

What is your status regarding the following exams?

|                |                                               | Already taken<br>(1)  | Plan to take<br>(2)   | Do not plan to take<br>(3) | Not sure<br>(4)       |
|----------------|-----------------------------------------------|-----------------------|-----------------------|----------------------------|-----------------------|
| <b>Po5_E4a</b> | MCAT (Medical College Admission Test)         | <input type="radio"/> | <input type="radio"/> | <input type="radio"/>      | <input type="radio"/> |
| <b>Po5_E4b</b> | GRE (Graduate Record Exam)                    | <input type="radio"/> | <input type="radio"/> | <input type="radio"/>      | <input type="radio"/> |
| <b>Po5_E4c</b> | LSAT (Law School Admission Test)              | <input type="radio"/> | <input type="radio"/> | <input type="radio"/>      | <input type="radio"/> |
| <b>Po5_E4d</b> | GMAT (Graduate Management Admission Test)     | <input type="radio"/> | <input type="radio"/> | <input type="radio"/>      | <input type="radio"/> |
| <b>Po5_E4e</b> | Other (please specify): [ <b>Po5_E4eTXT</b> ] | <input type="radio"/> | <input type="radio"/> | <input type="radio"/>      | <input type="radio"/> |

**Po5\_E5** How much impact has the SR-EIP/LAMI had on how you view your future plans?

- A great deal (1)
- Some (2)
- A little (3)
- None (4)
